# Supplementary material for: Synthesis, Characterization, Cytotoxicity, and Antibacterial Properties of trans‐γ‐Halo‐δ‐lactones
Source: PubMed Central journal article supplement — ChemistryOpen. 2018 Jul 23;7(7):543–50. doi: 10.1002/open.201800110 (PMC6055027; doi:10.1002/open.201800110), 2018-07-23
Supplement: OPEN-7-543-s001.pdf [file OPEN-7-543-s001.pdf]

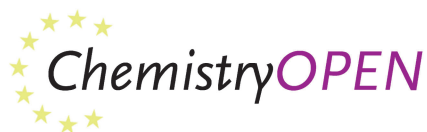

## Supporting Information

© 2018 The Authors. Published by Wiley-VCH Verlag GmbH & Co. KGaA, Weinheim

### **Synthesis, Characterization, Cytotoxicity, and Antibacterial Properties of *trans*- $\gamma$ -Halo- $\delta$ -lactones**

Angelika Kamizela,<sup>\*,[a]</sup> Barbara Gawdzik,<sup>[a]</sup> Mariusz Urbaniak,<sup>[a]</sup> Łukasz Lechowicz,<sup>[b]</sup>  
Agata Białońska,<sup>[c]</sup> Weronika Gonciarz,<sup>[d]</sup> and Magdalena Chmiela<sup>[d]</sup>

open\_201800110\_sm\_miscellaneous\_information.pdf

Spectral analysis of lactones **5-7a-c**

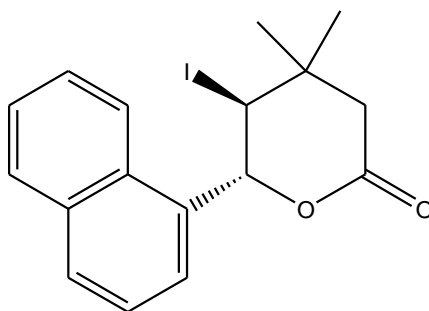

**Compound 5a** *trans*-5-iodo-4,4-dimethyl-6-( $\alpha$ -naphthyl) tetrahydro-2H-pyran-2-one

Yield 93%, yellow crystals, m.p. =118–119°C

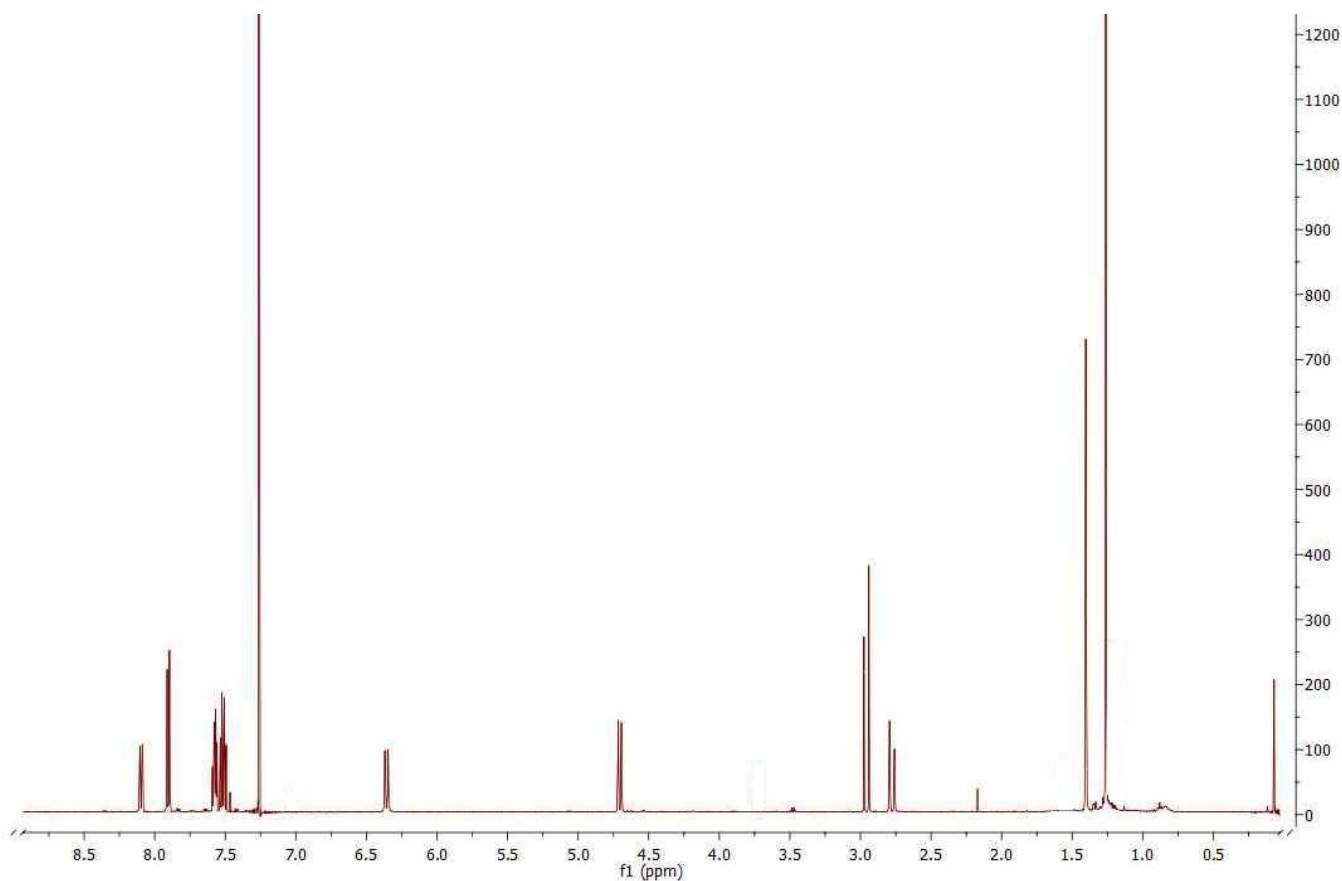

$^1\text{H}$  NMR ( $\text{CDCl}_3$ , 500 MHz)  $\delta$  [ppm]: 1.26 (s,  $\text{C}(\text{CH}_3)_2$ , 3H), 1.40 (s,  $\text{C}(\text{CH}_3)_2$ , 3H), 2.78 (d,  $J = 17.3$  Hz,  $\text{CH}_2$ , 1H), 2.96 (d,  $J = 17.3$  Hz,  $\text{CH}_2$ , 1H), 4.71 (d,  $J = 11.4$  Hz,  $\text{CHI}$ , 1H), 6.36 (d,  $J = 11.4$  Hz,  $\text{CHAr}$ , 1H), 7.48–7.55 (m,  $\text{HAr}$ , 2H), 7.56–7.61 (m,  $\text{HAr}$ , 2H), 7.90 (d,  $J = 8.2$  Hz,  $\text{HAr}$ , 2H), 8.10 (d,  $J = 8.6$  Hz,  $\text{HAr}$ , 1H).

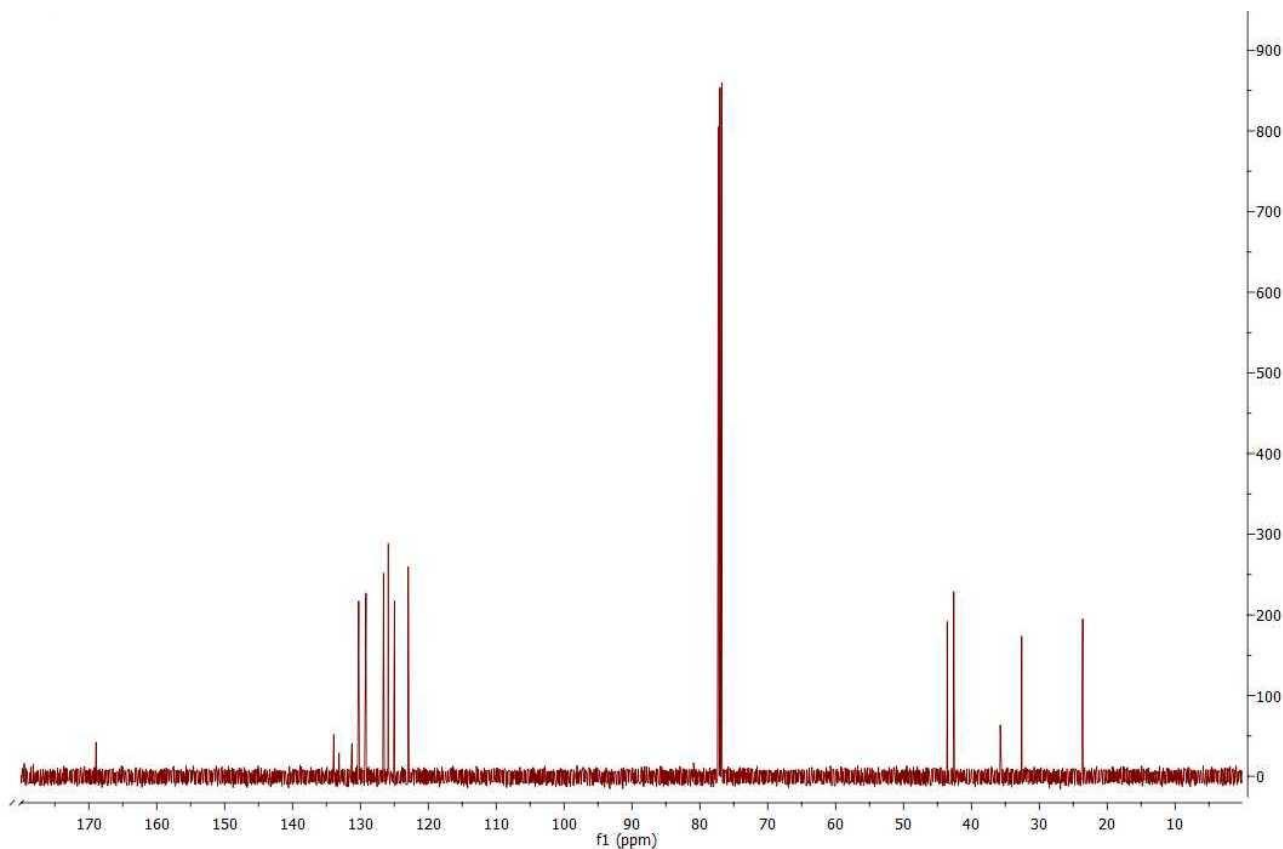

$^{13}\text{C}$  NMR (125 Hz,  $\text{CDCl}_3$ )  $\delta$  [ppm]: 23.60, 32.58, 35.75, 42.59, 43.57, 77.23, 122.95, 124.98, 125.90, 125.95, 126.60, 129.16, 130.4, 131.24, 133.13, 133.92, 168.94.

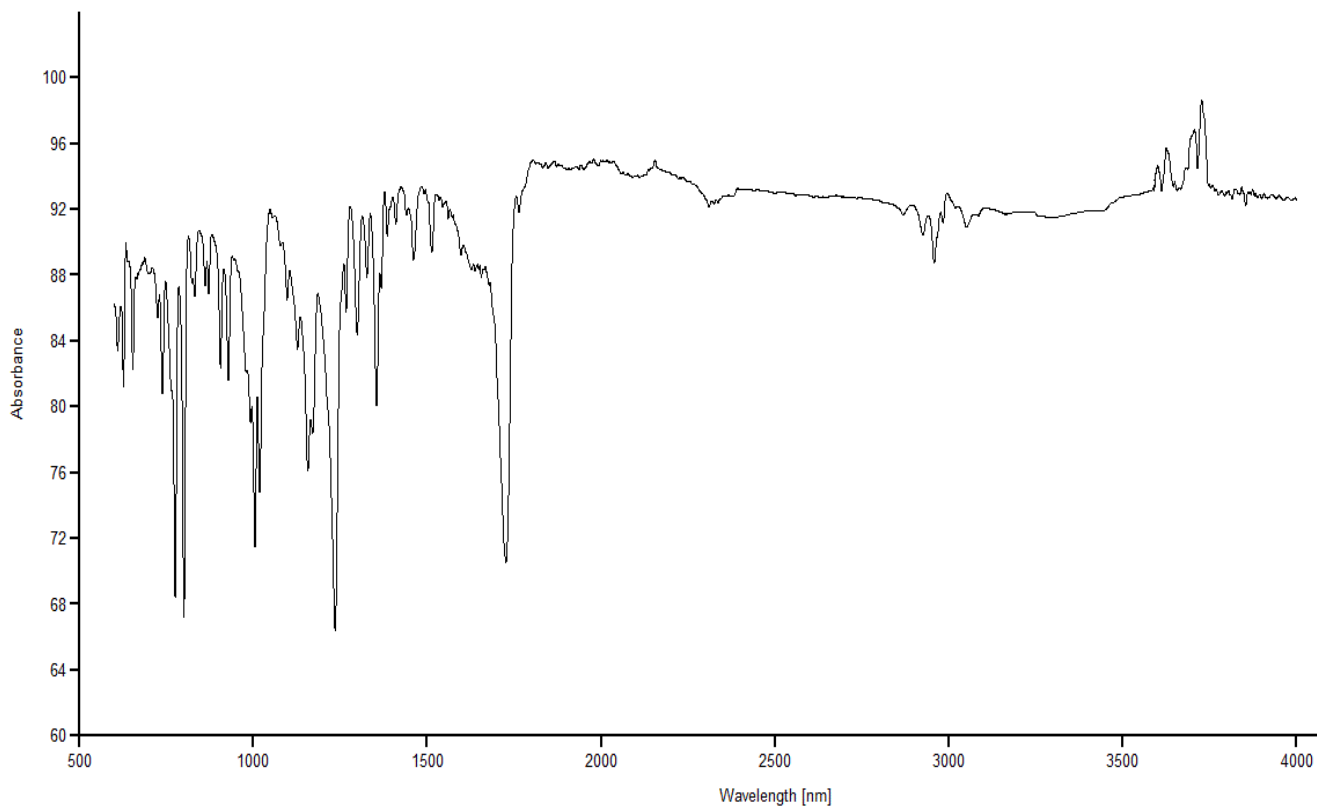

IR: 1723, 1352, 1235, 1155, 1020, 1002, 800, 775, 735, 650, 620, 610  $\text{cm}^{-1}$ .

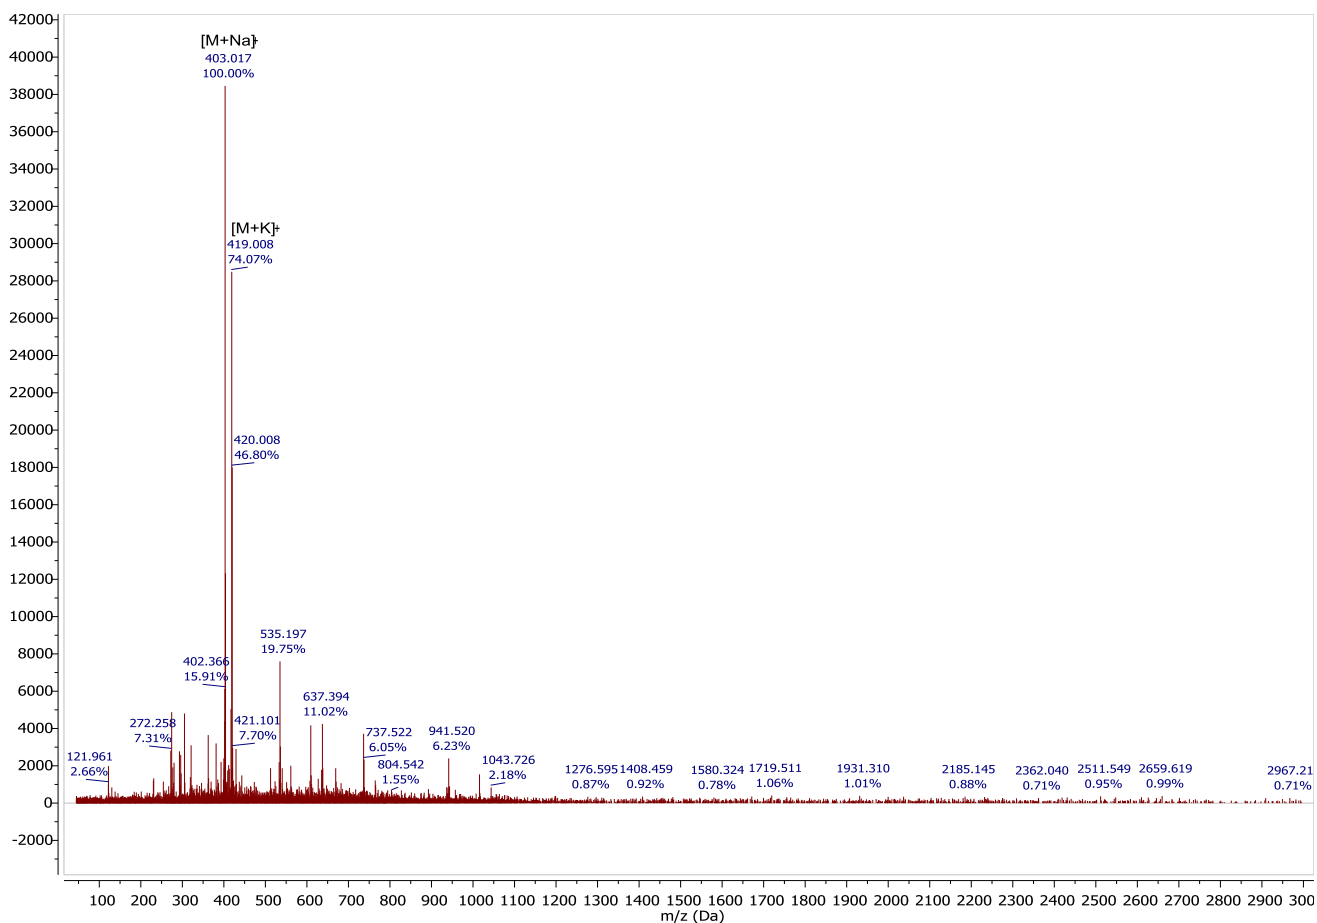

HR-MS (ESI-TOF) calculated for  $C_{17}H_{17}IO_2$ ,  $m/z$   $[M+Na]^+$ : 403.0170952; experimental value: 403.017215

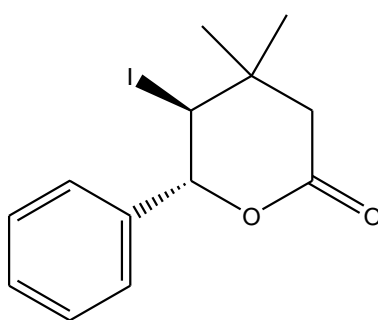

**Compound 5b** *trans*-5-iodo-4,4-dimethyl-6-phenyl-tetrahydro-2H-pyran-2-one

Yield 87%, yellow crystals, m.p. = 72–73°C,

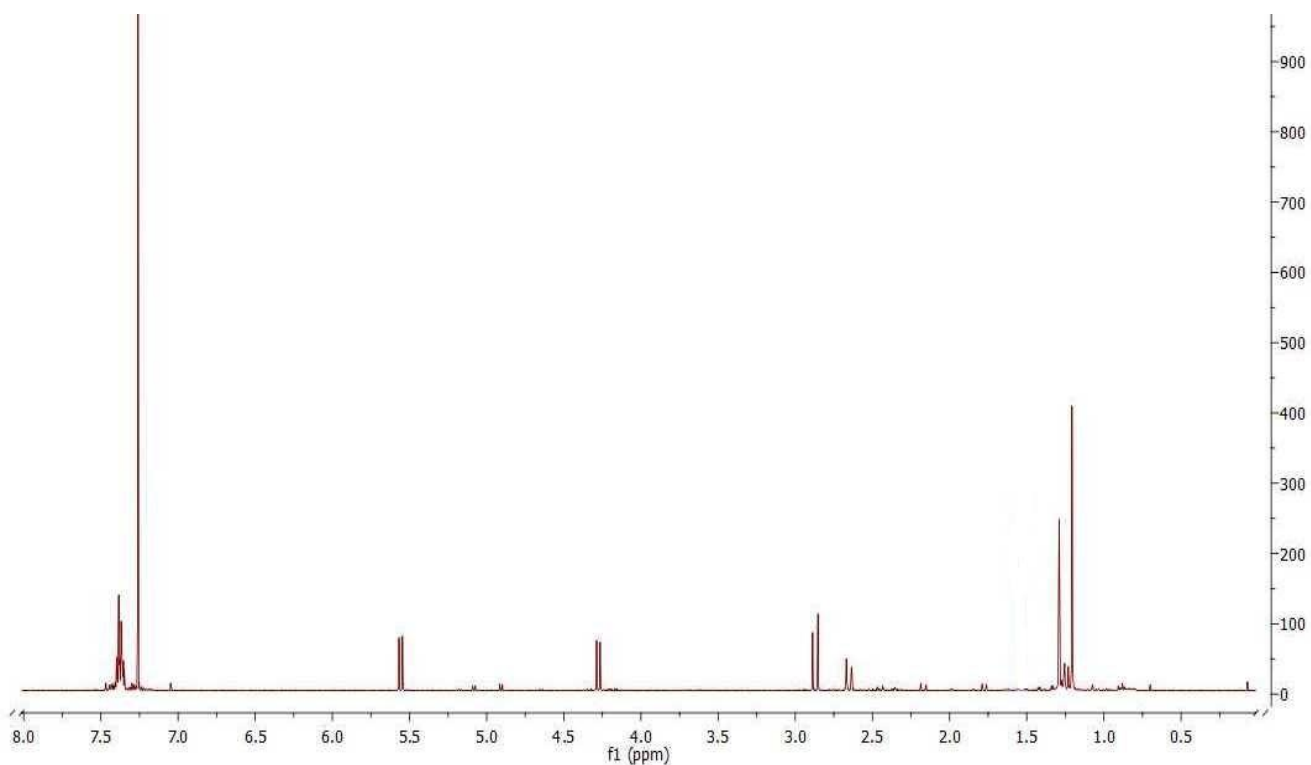

$^1\text{H}$  NMR ( $\text{CDCl}_3$ , 500 MHz),  $\delta$  [ppm]: 1.21 (s,  $\text{C}(\text{CH}_3)_2$ , 3H), 1.29 (s,  $\text{C}(\text{CH}_3)_2$ , 3H), 2.65 (d,  $J = 17.3$  Hz,  $\text{CH}_2$ , 1H), 2.87 (d,  $J = 17.3$  Hz,  $\text{CH}_2$ , 1H), 4.28 (d,  $J = 11.3$  Hz,  $\text{CHBr}$ , 1H), 5.56 (d,  $J = 11.3$  Hz,  $\text{CHAr}$ , 1H), 7.34–7.48 (m,  $\text{HAr}$ , 5H).

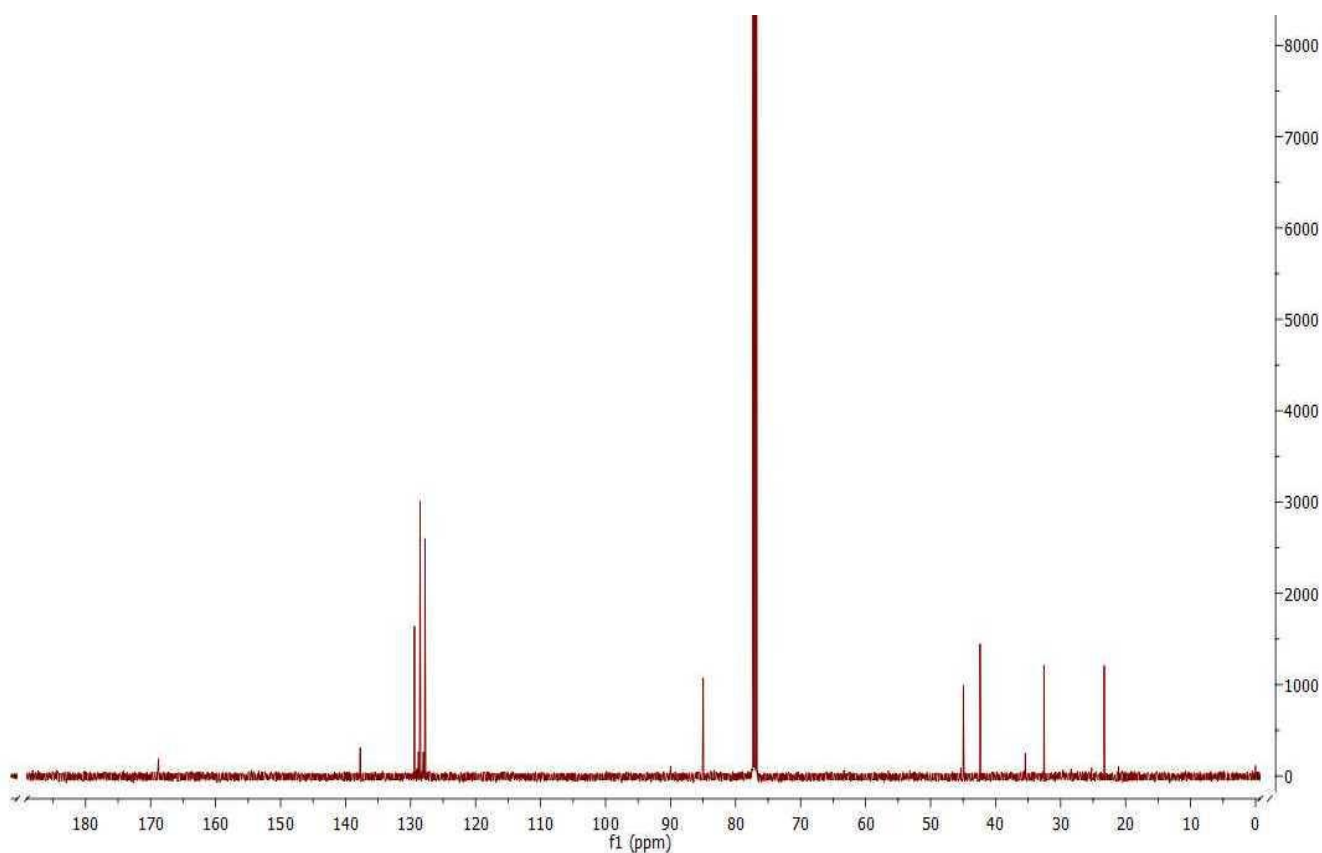

$^{13}\text{C}$  NMR (125Hz,  $\text{CDCl}_3$ )  $\delta$  [ppm]: 23.28, 32.57, 35.44, 42.38, 44.97, 84.98, 127.78, 128.53, 129.40, 137.75, 168.91.

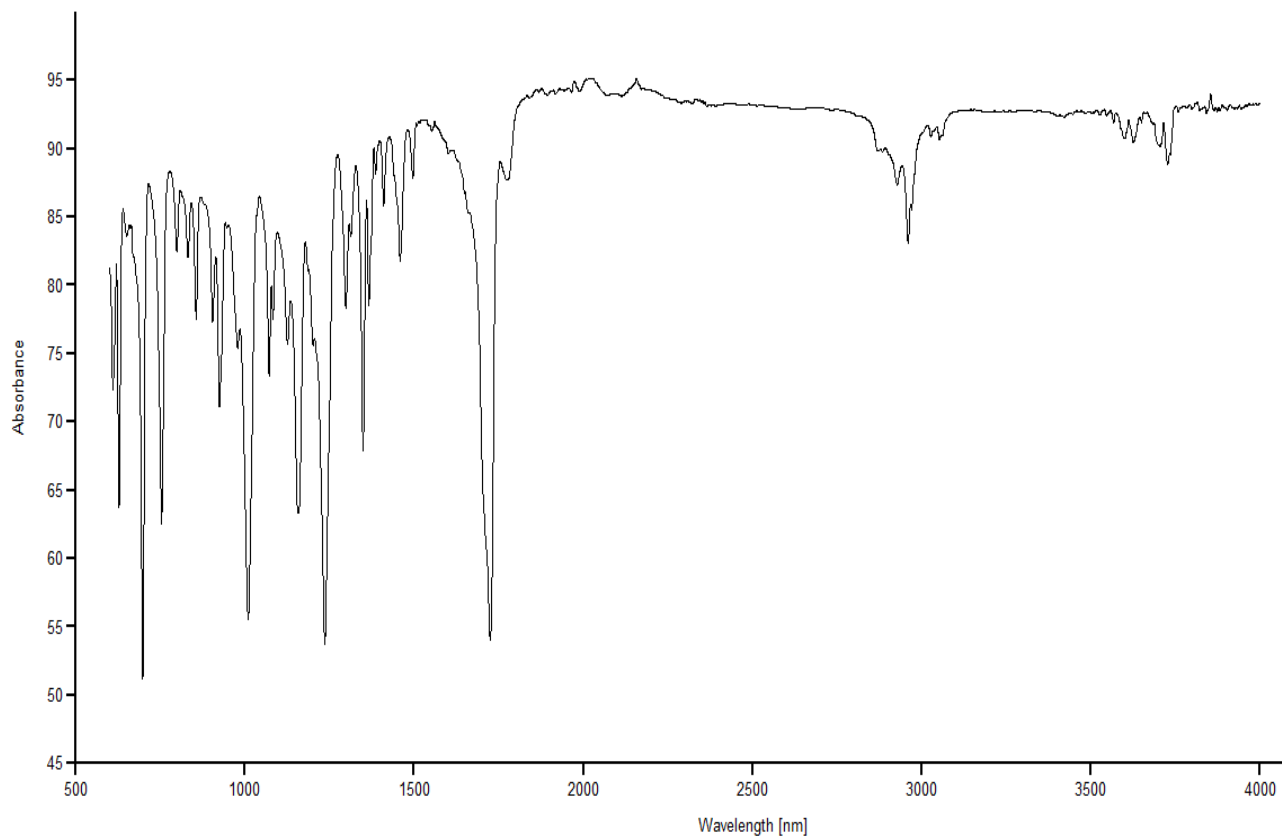

IR: 1723, 1460, 1350, 1240, 1160, 1070, 1005, 925, 851, 750, 700, 620, 609  $\text{cm}^{-1}$ .

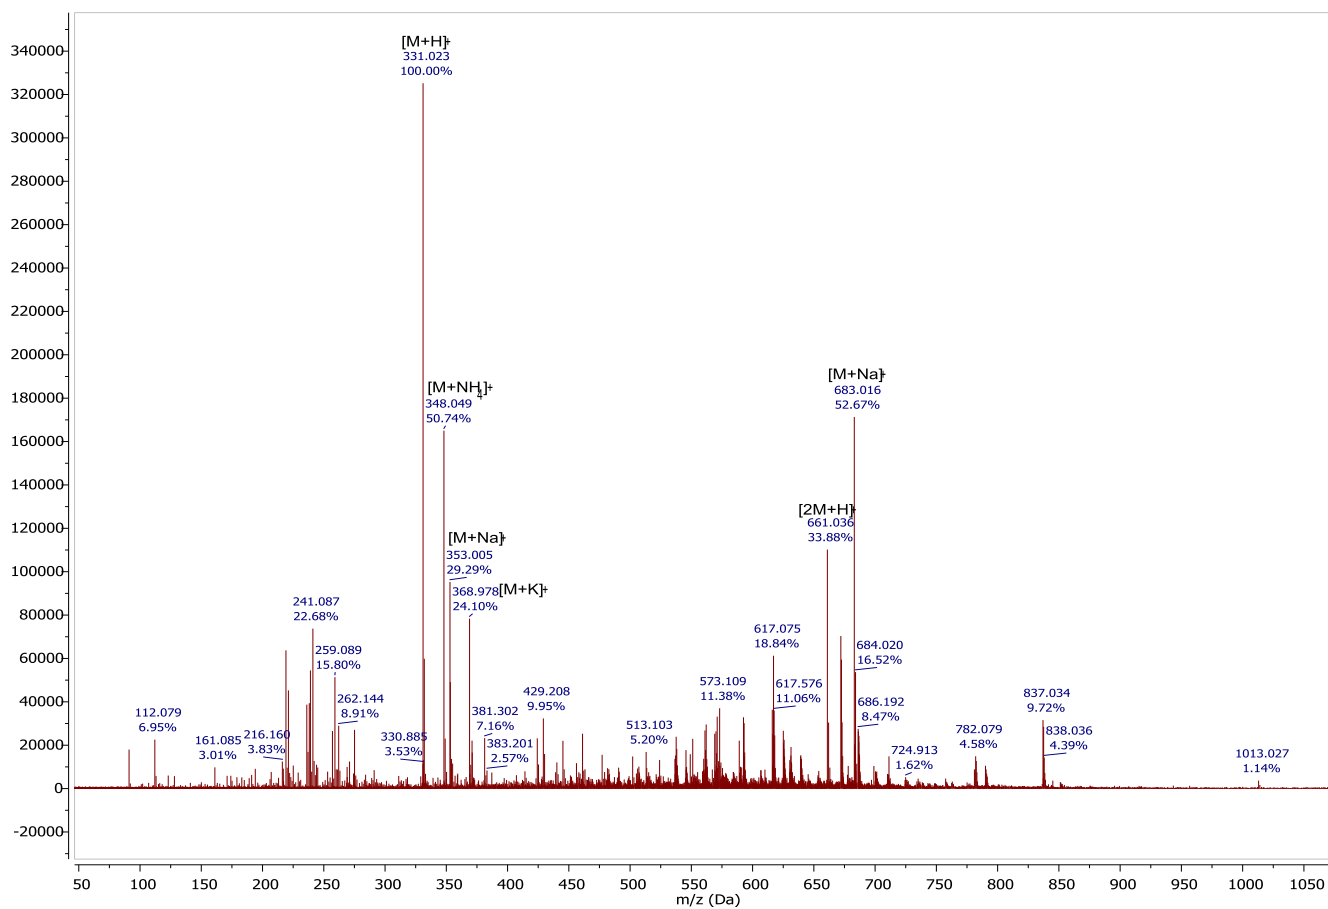

HR-MS (ESI-TOF) calculated for  $\text{C}_{13}\text{H}_{15}\text{O}_2$ ,  $m/z$  [M+Na]<sup>+</sup>: 353.003446; experimental value: 353.004945.

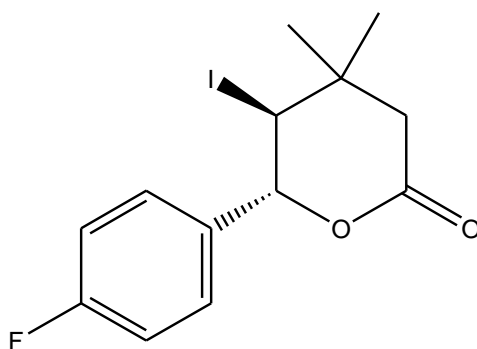

**Compound 5c** *trans*-6-(*p*-fluorophenyl)-5-iodo-4,4-dimethyltetrahydro-2H-pyran-2-one

Yield 60%, yellow crystals, m.p. = 81–82°C,

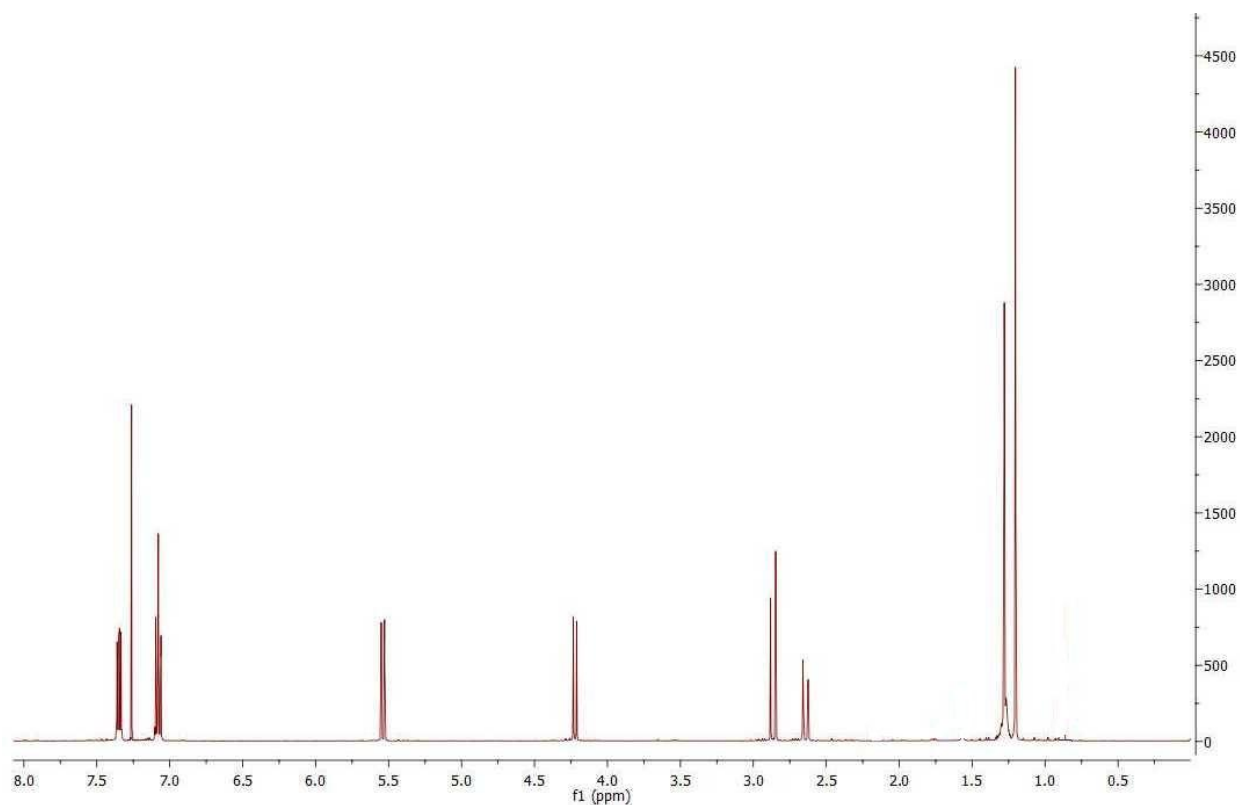

$^1\text{H}$  NMR ( $\text{CDCl}_3$ , 500 MHz)  $\delta$  [ppm]: 1.20 (s,  $\text{C}(\text{CH}_3)_2$ , 3H), 1.28 (s,  $\text{C}(\text{CH}_3)_2$ , 3H), 2.64 (d,  $J = 17.3$  Hz,  $\text{CH}_2$ , 1H), 2.76 (d,  $J = 17.3$  Hz,  $\text{CH}_2$ , 1H), 4.22 (d,  $J = 11.4$  Hz,  $\text{CHI}$ , 1H), 5.54 (d,  $J = 11.4$  Hz,  $\text{CHAr}$ , 1H), 7.04–7.14 (m,  $\text{HAr}$ , 2H), 7.32–7.35 (m,  $\text{HAr}$ , 2H).

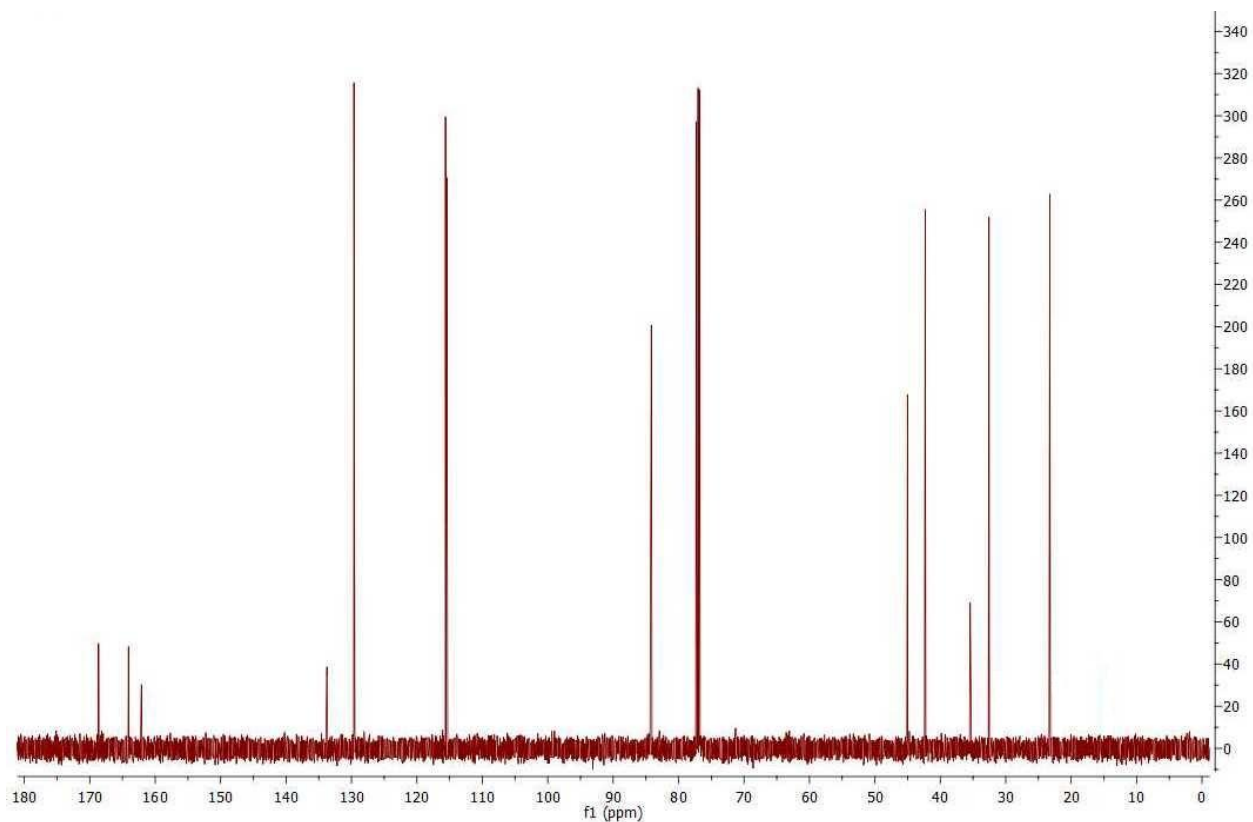

$^{13}\text{C}$  NMR (125 Hz,  $\text{CDCl}_3$ )  $\delta$  [ppm]: 23.26, 32.56, 35.43, 42.31, 45.01, 84.16, 115.54, 129.59, 133.77, 163.09, 168.65.

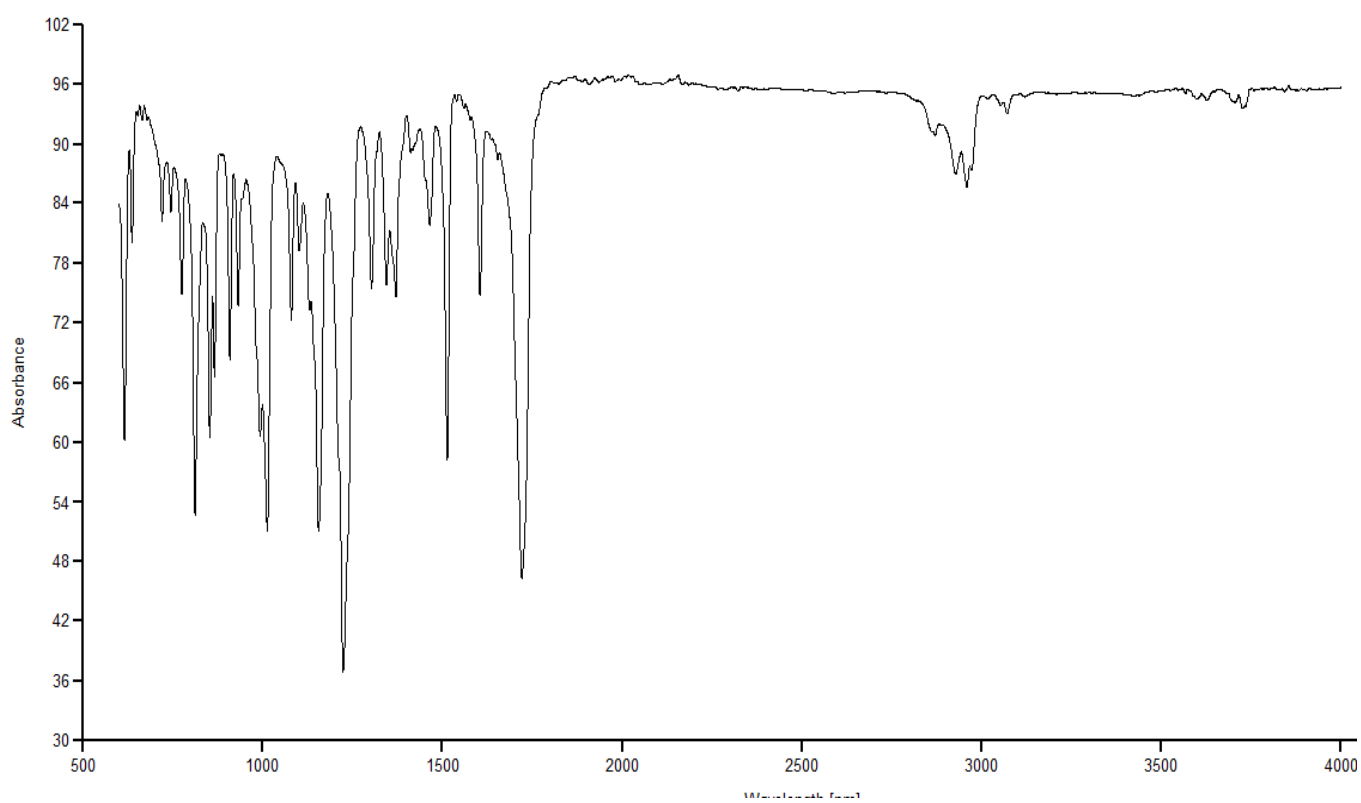

IR: 1720, 1605, 1515, 1368, 1342, 1300, 1220, 1154, 1078, 1009, 904, 850, 805, 615  $\text{cm}^{-1}$ .



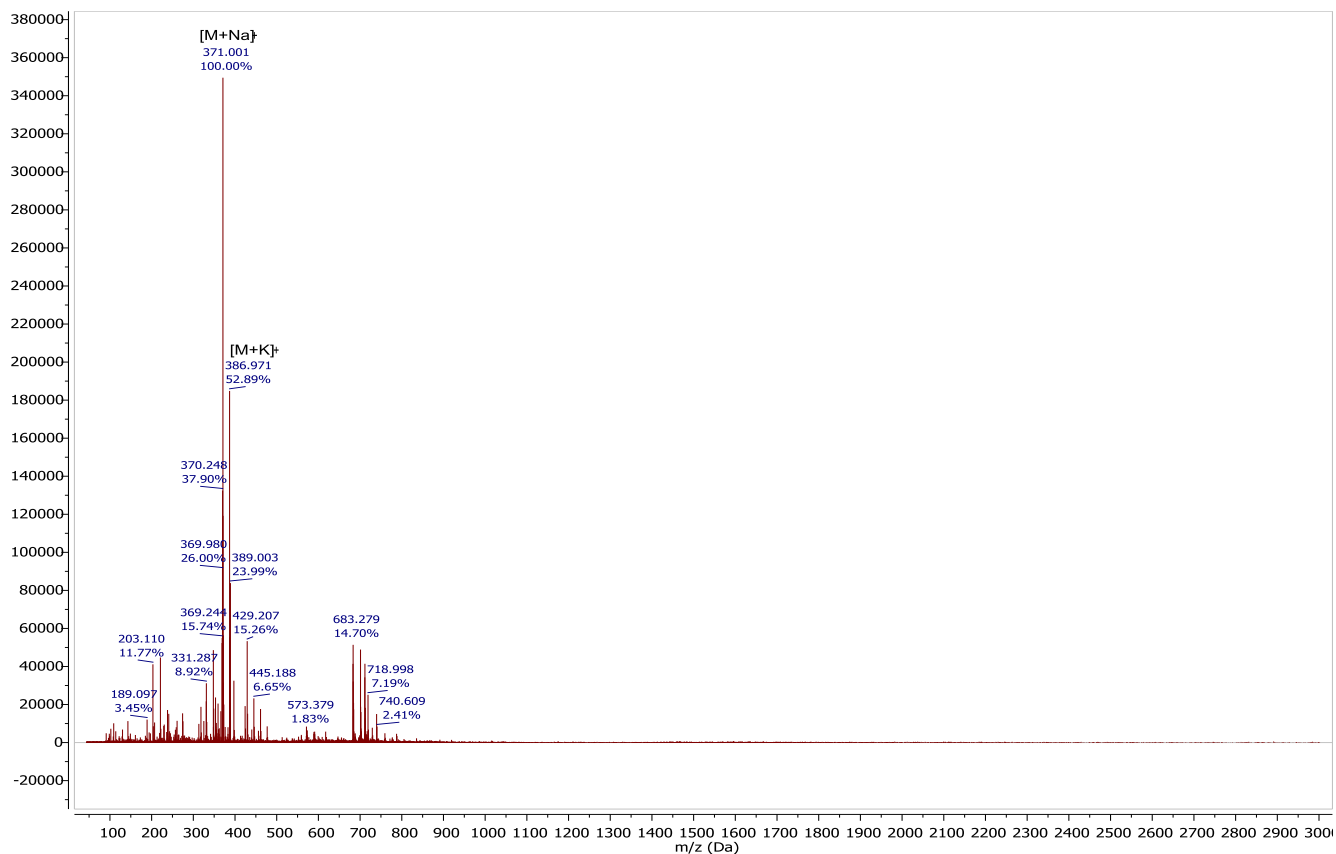

HR-MS (ESI-TOF) calculated for  $C_{13}H_{14}FO_2$ ,  $m/z$   $[M+Na]^+$ : 370.9920246; experimental value: 371.001004.

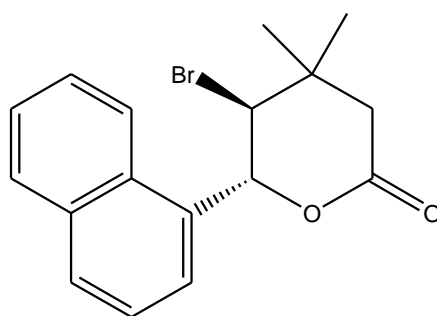

**Compound 6a** *trans*-5-bromo-4,4-dimethyl-6-( $\alpha$ -naphthyl) tetrahydro-2H-pyran-2-one

Yield 62%, colorless crystals, m.p. = 197–198°C,

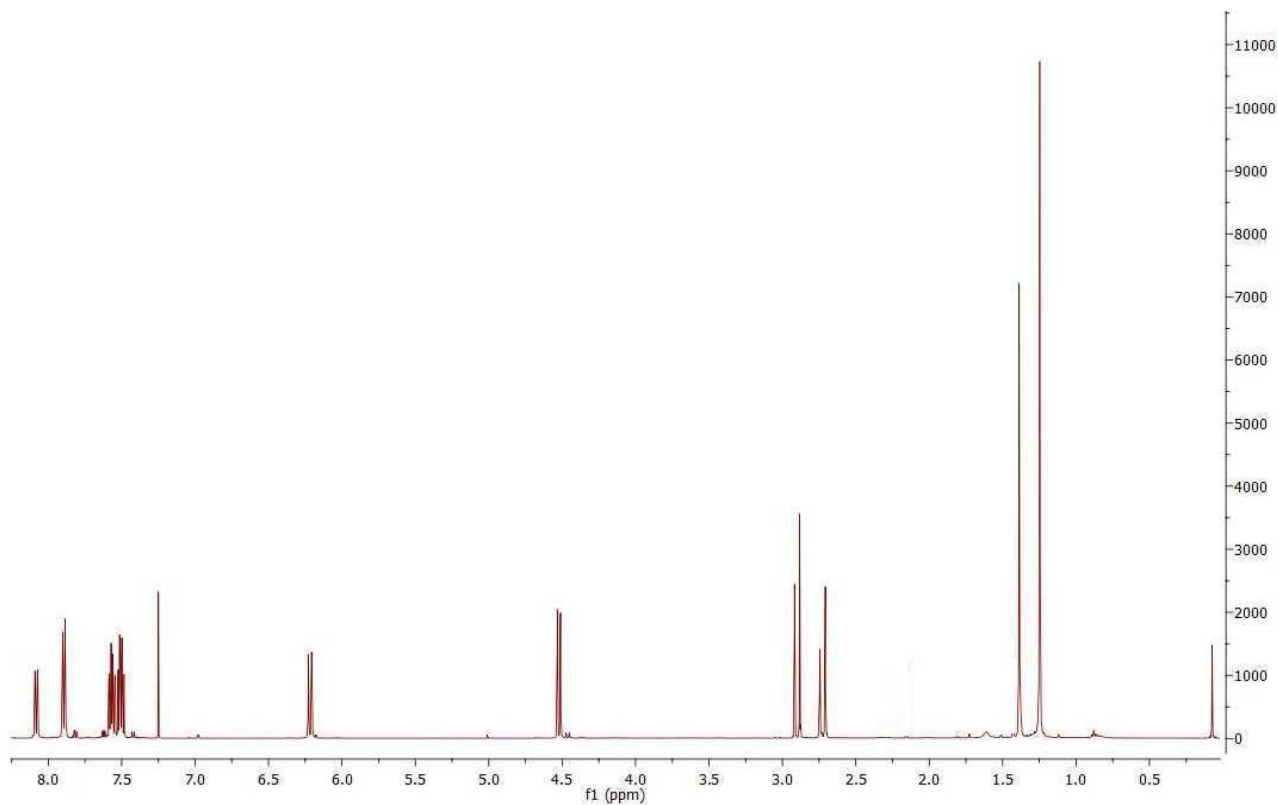

<sup>1</sup>H NMR (CDCl<sub>3</sub>, 500 MHz), δ [ppm]: 1.29 (s, C(CH<sub>3</sub>)<sub>2</sub>, 3H), 1.42 (s, C(CH<sub>3</sub>)<sub>2</sub>, 3H), 2.76 (d, *J* = 17.4 Hz, CH<sub>2</sub>, 1H), 2.94 (d, *J* = 17.4 Hz, CH<sub>2</sub>, 1H) 4.56 (d, *J* = 10.7 Hz, CHBr, 1H), 6.25 (d, *J* = 10.7 Hz, CHAr, 1H), 7.47–7.53 (m, HAr, 2H), 7.53–7.59 (m, HAr, 2H), 7.89 (d, *J* = 8.2 Hz, HAr, 2H), 8.08 (d, *J* = 8.6 Hz, HAr, 1H).

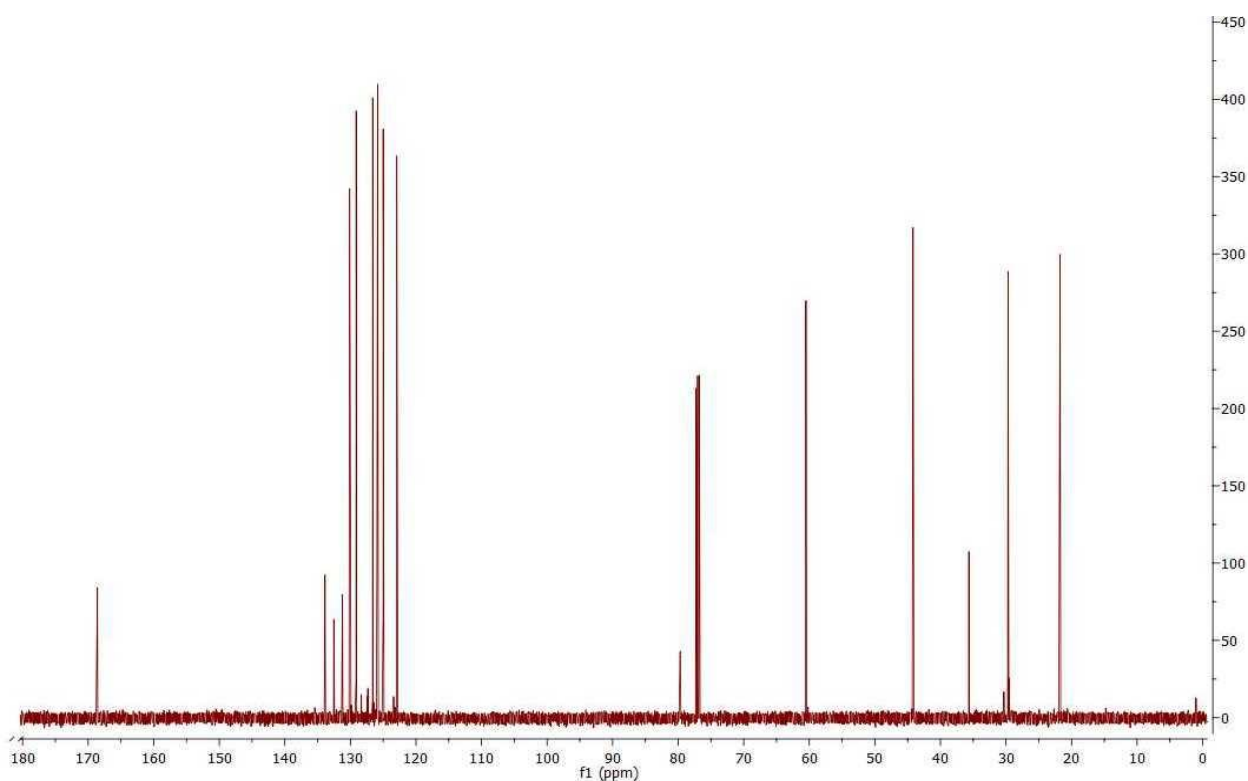

<sup>13</sup>C NMR (125 Hz, CDCl<sub>3</sub>) δ [ppm]: 21.74, 29.68, 35.65, 44.18, 60.51, 79.69, 122.93, 125.00, 125.85, 125.95, 126.60, 129.12, 130.12, 131.22, 132.53, 133.88, 168.59

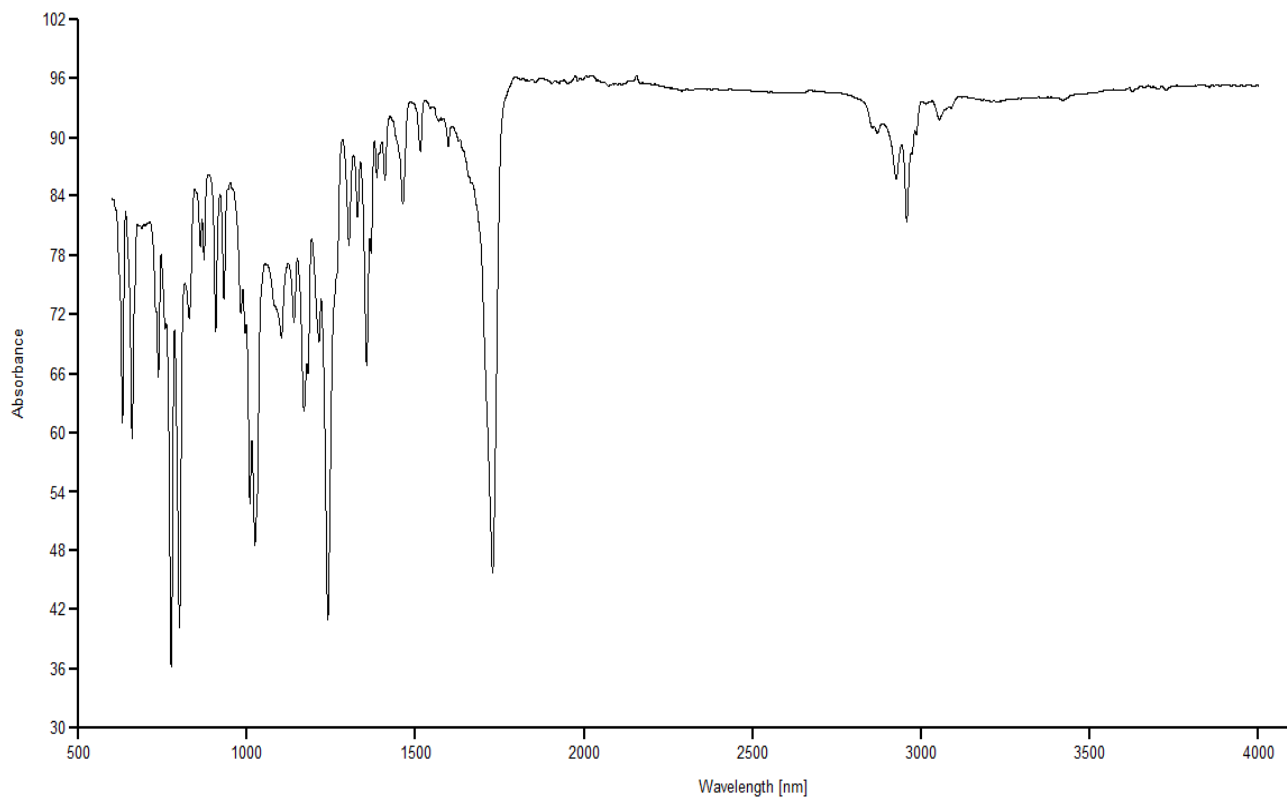

IR: 1730, 1460, 1355, 1240, 1160, 1100, 1020, 1007, 908, 802, 780, 740, 660, 630  $\text{cm}^{-1}$ .

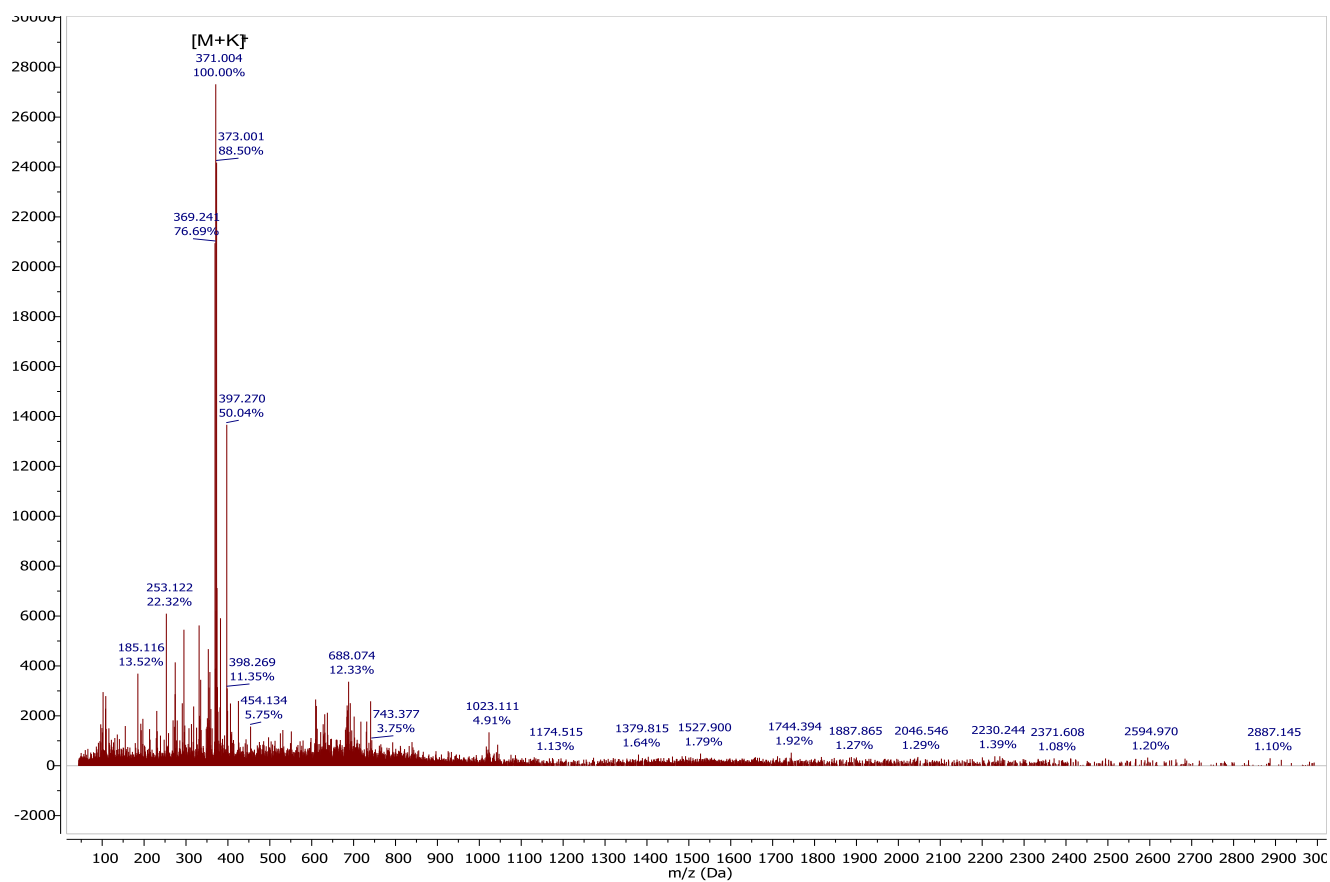

HR-MS (ESI-TOF) calculated for  $\text{C}_{17}\text{H}_{17}\text{BrO}_2$ ,  $m/z$   $[\text{M}+\text{K}]^+$ : 371.0048922; experimental value: 371.004088.

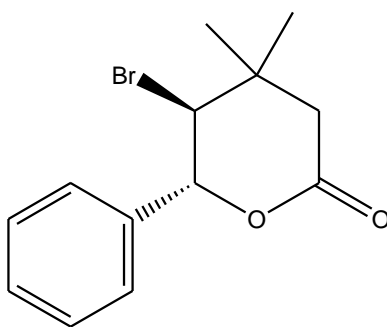

**Compound 6b** *trans*-5-bromo-4,4-dimethyl-6-phenyl-tetrahydro-2H-pyran-2-one

Yield 59%, colorless crystals, m.p. = 107–108 °C,

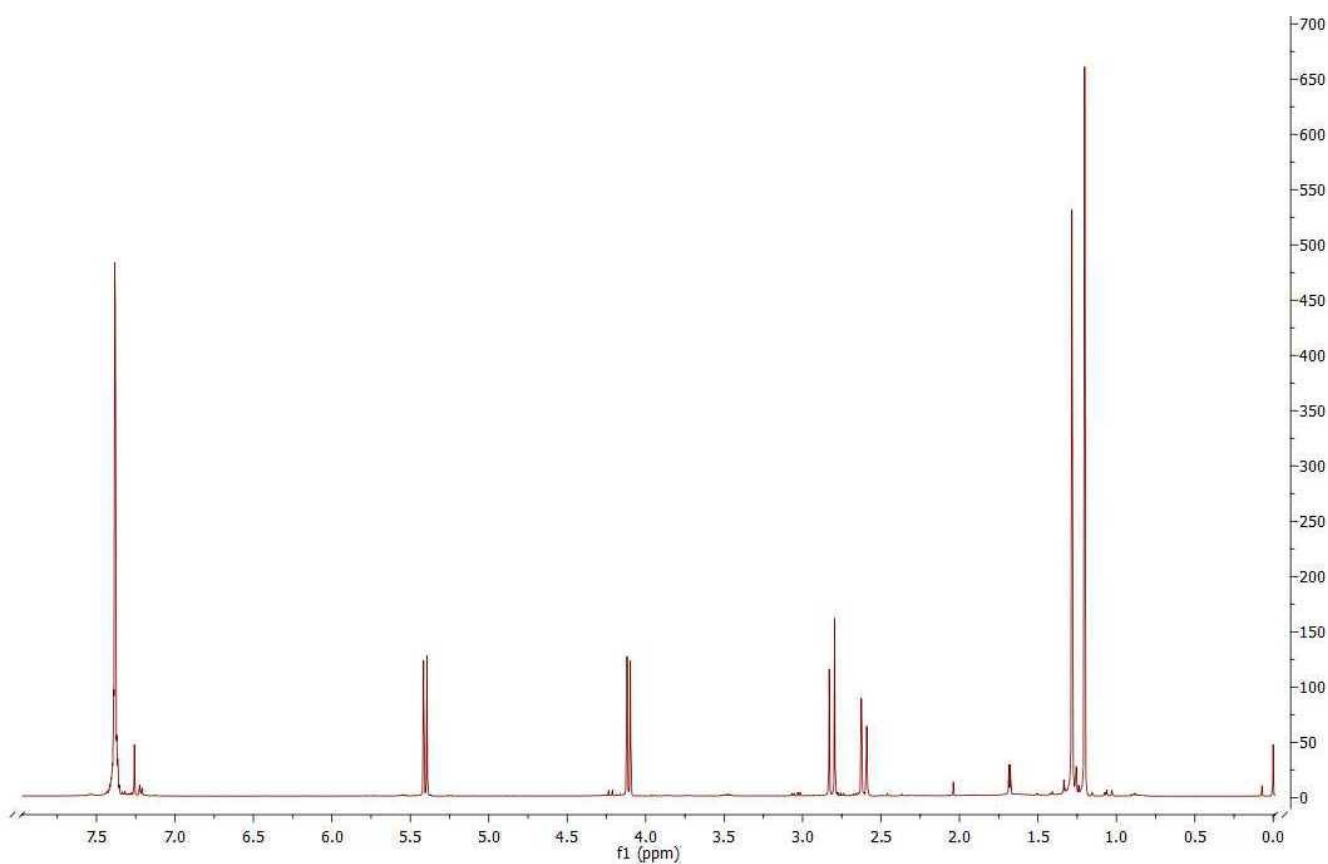

$^1\text{H}$  NMR ( $\text{CDCl}_3$ , 500 MHz),  $\delta$  [ppm]: 1.20 (s,  $\text{C}(\text{CH}_3)_2$ , 3H), 1.28 (s,  $\text{C}(\text{CH}_3)_2$ , 3H), 2.61 (d,  $J = 17.4$  Hz,  $\text{CH}_2$ , 1H), 2.81 (d,  $J = 17.4$  Hz,  $\text{CH}_2$ , 1H), 4.11 (d,  $J = 10.8$  Hz,  $\text{CHBr}$ , 1H), 5.40 (d,  $J = 10.8$  Hz,  $\text{CHAr}$ , 1H), 7.35–7.42 (m,  $\text{HAr}$ , 5H).

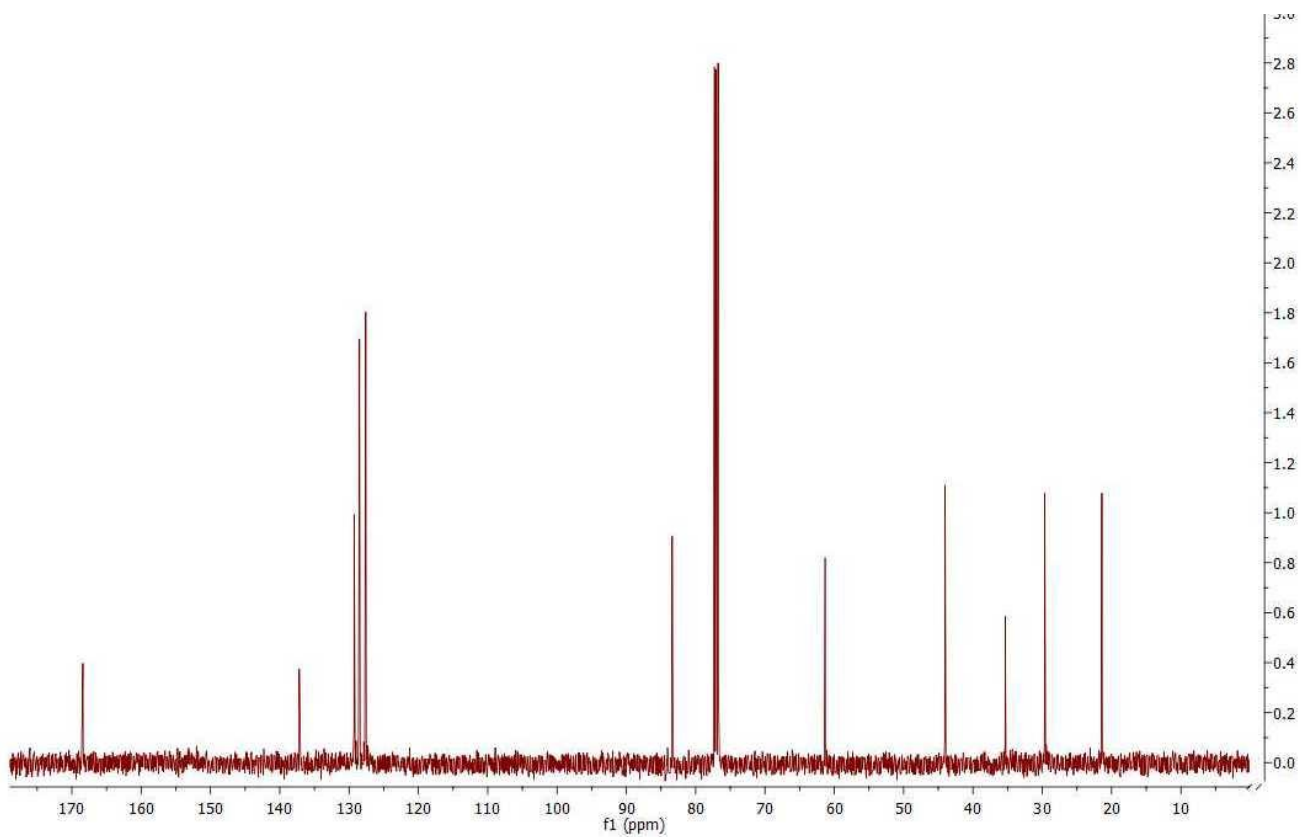

$^{13}\text{C}$  NMR (125 Hz,  $\text{CDCl}_3$ )  $\delta$  [ppm]: 21.40, 29.64, 35.53, 44.02, 61.33, 83.39, 168.40, 127.59, 128.50, 129.25, 137.19.

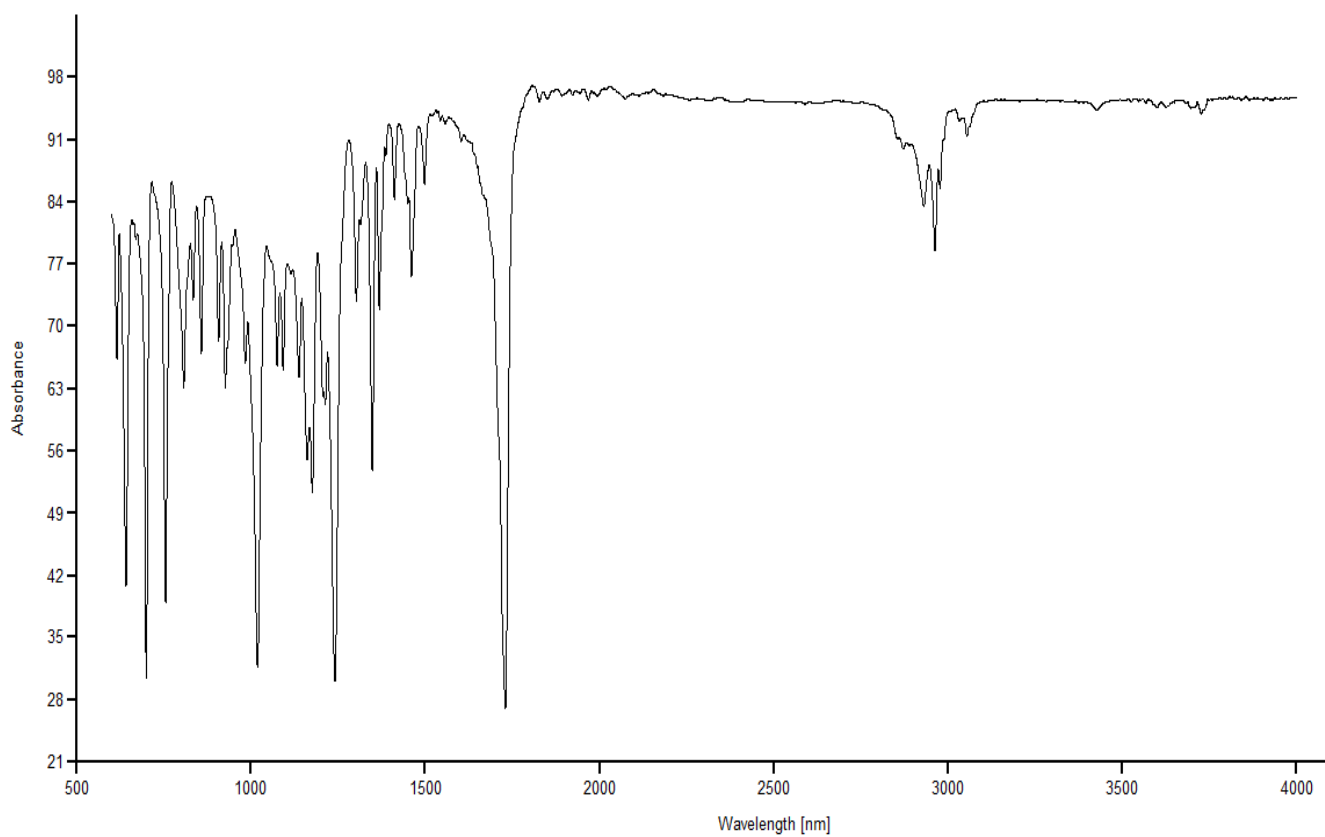

IR: 1730, 1462, 1340, 1235, 1180, 1017, 923, 860, 806, 755, 670, 640  $\text{cm}^{-1}$ .

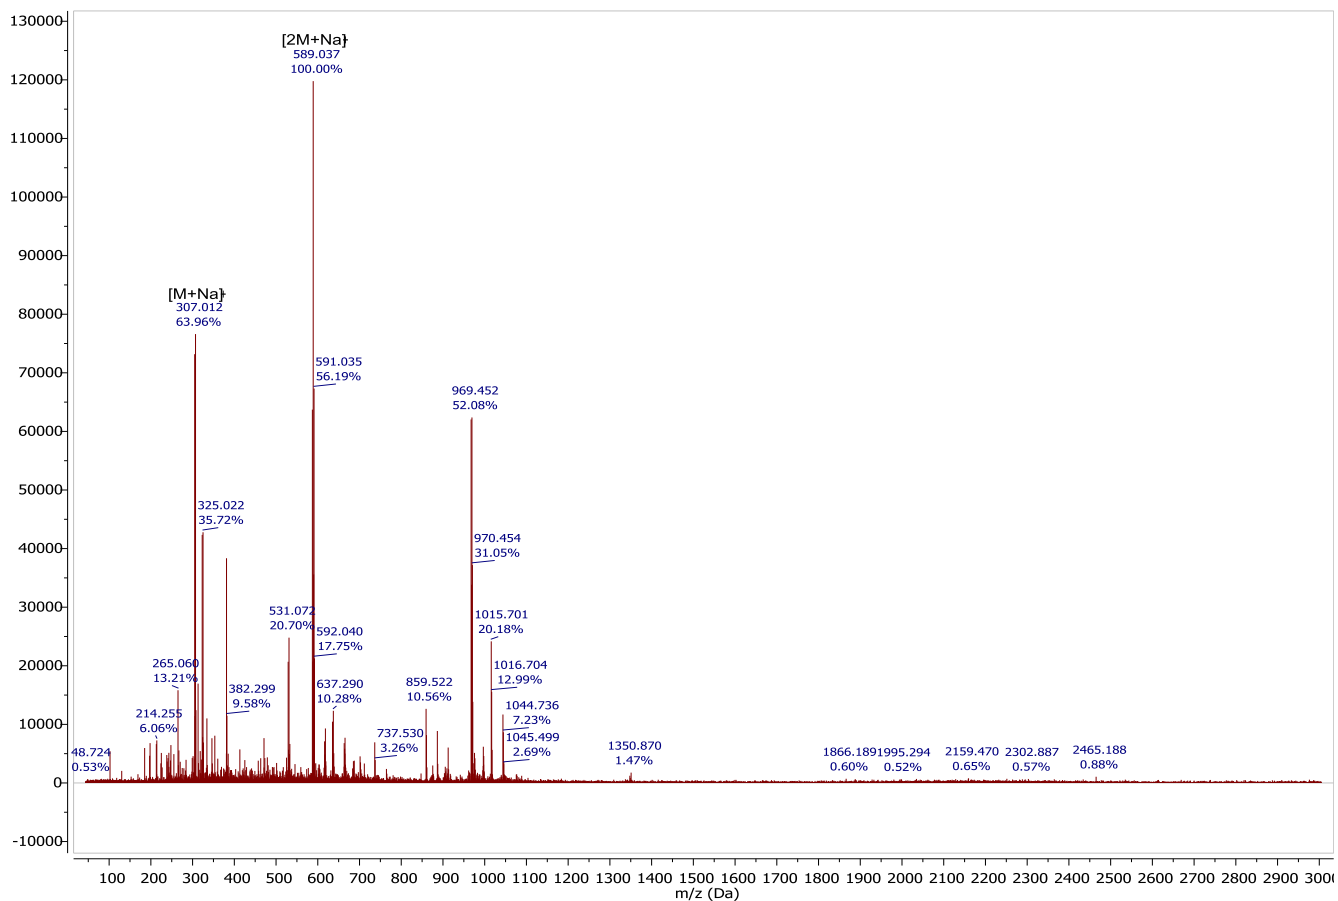

HR-MS (ESI-TOF) calculated for  $C_{13}H_{15}BrO_2$ ,  $m/z$   $[M+Na]^+$ : 305.015305; experimental value: 305.013815

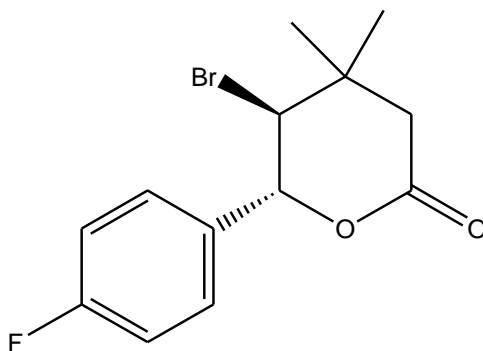

**Compound 6c** *trans*-5-bromo-6-(*p*-fluorophenyl)-4,4-dimethyltetrahydro-2H-pyran-2-one

Yield 85%, colorless crystals, m.p. = 102–103 °C,

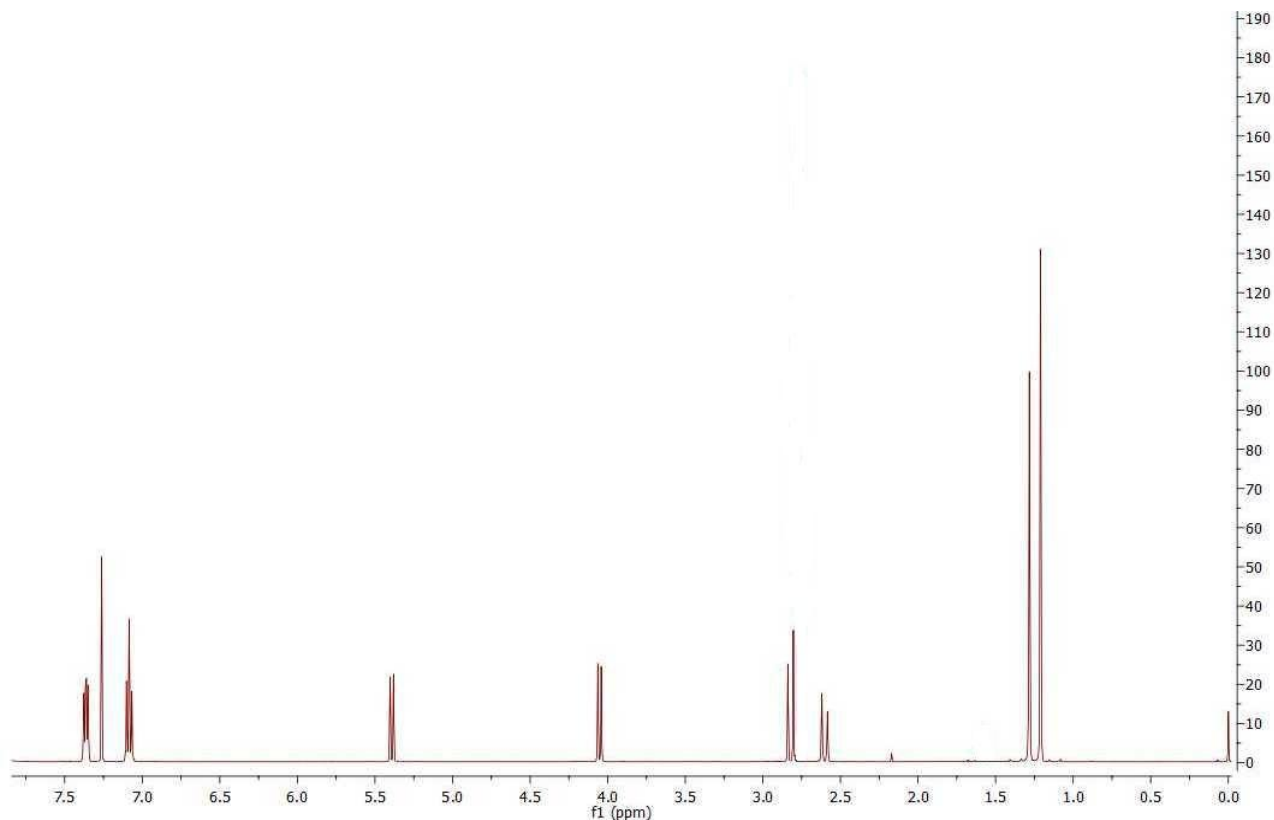

<sup>1</sup>H NMR (CDCl<sub>3</sub>, 500 MHz) δ [ppm]: 1.21 (s, C(CH<sub>3</sub>)<sub>2</sub>, 3H), 1.28 (s, C(CH<sub>3</sub>)<sub>2</sub>, 3H), 2.60 (d, *J* = 17.4 Hz, CH<sub>2</sub>, 1H), 2.82 (d, *J* = 17.4 Hz, CH<sub>2</sub>, 1H), 4.05 (d, *J* = 10.8 Hz, CHBr, 1H), 5.39 (d, *J* = 10.8 Hz, CHAr, 1H), 7.03–7.12 (m, HAr, 2H), 7.32–7.39 (m, HAr, 2H).

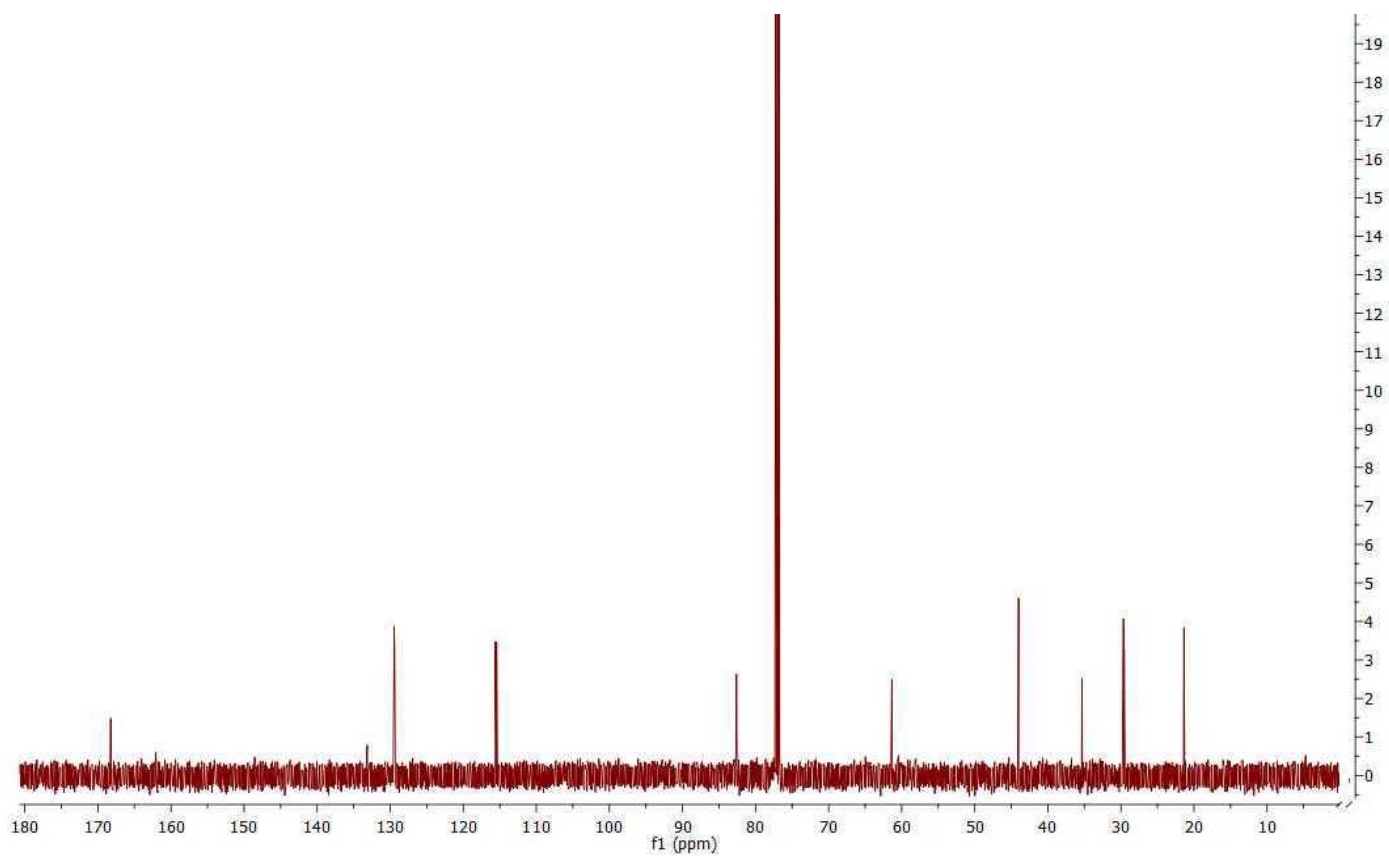

<sup>13</sup>C NMR (125Hz, CDCl<sub>3</sub>) δ [ppm]: 21.38, 29.55, 35.34, 44.01, 61.35, 82.61, 115.52, 129.42, 133.12, 163.05, 168.25.

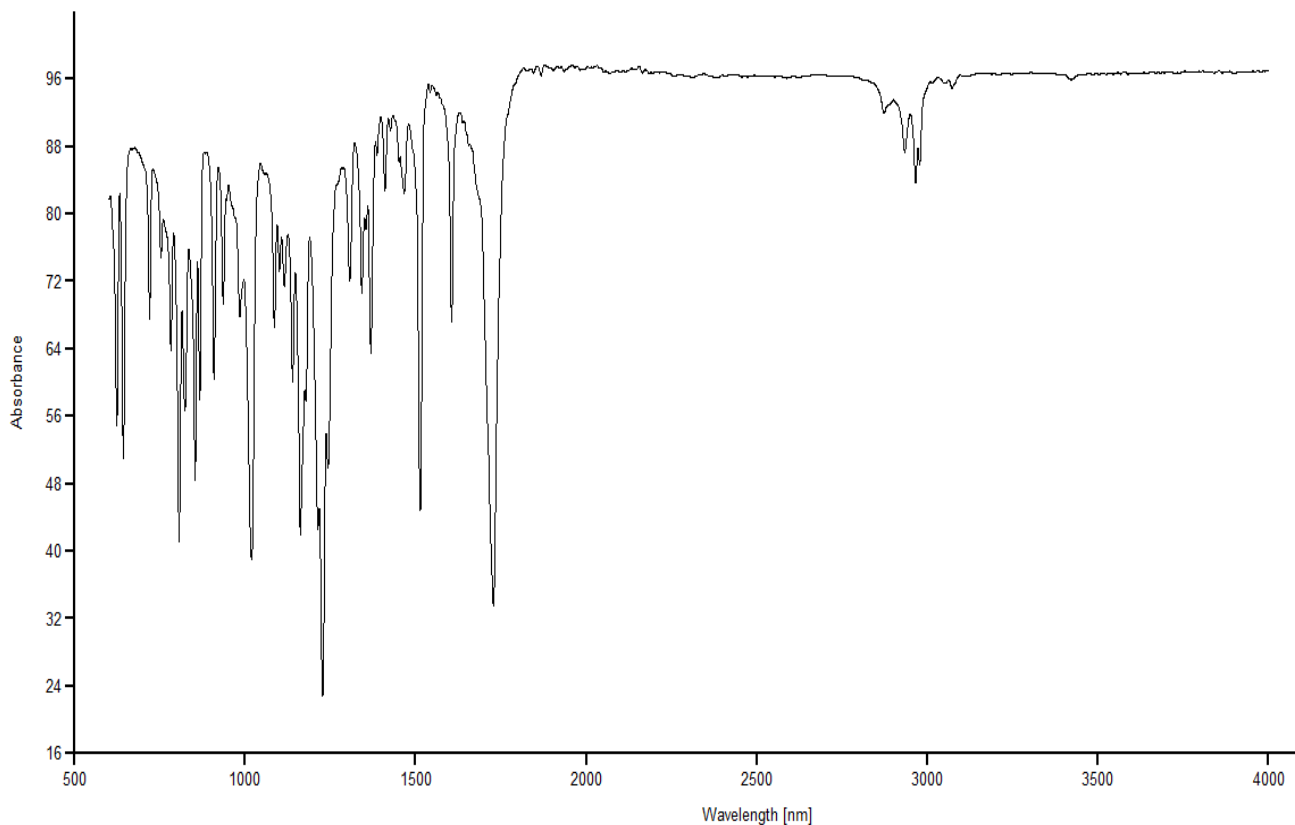

IR: 1726, 1510, 1360, 1230, 1160, 1020, 905, 855, 805, 650, 620  $\text{cm}^{-1}$ .

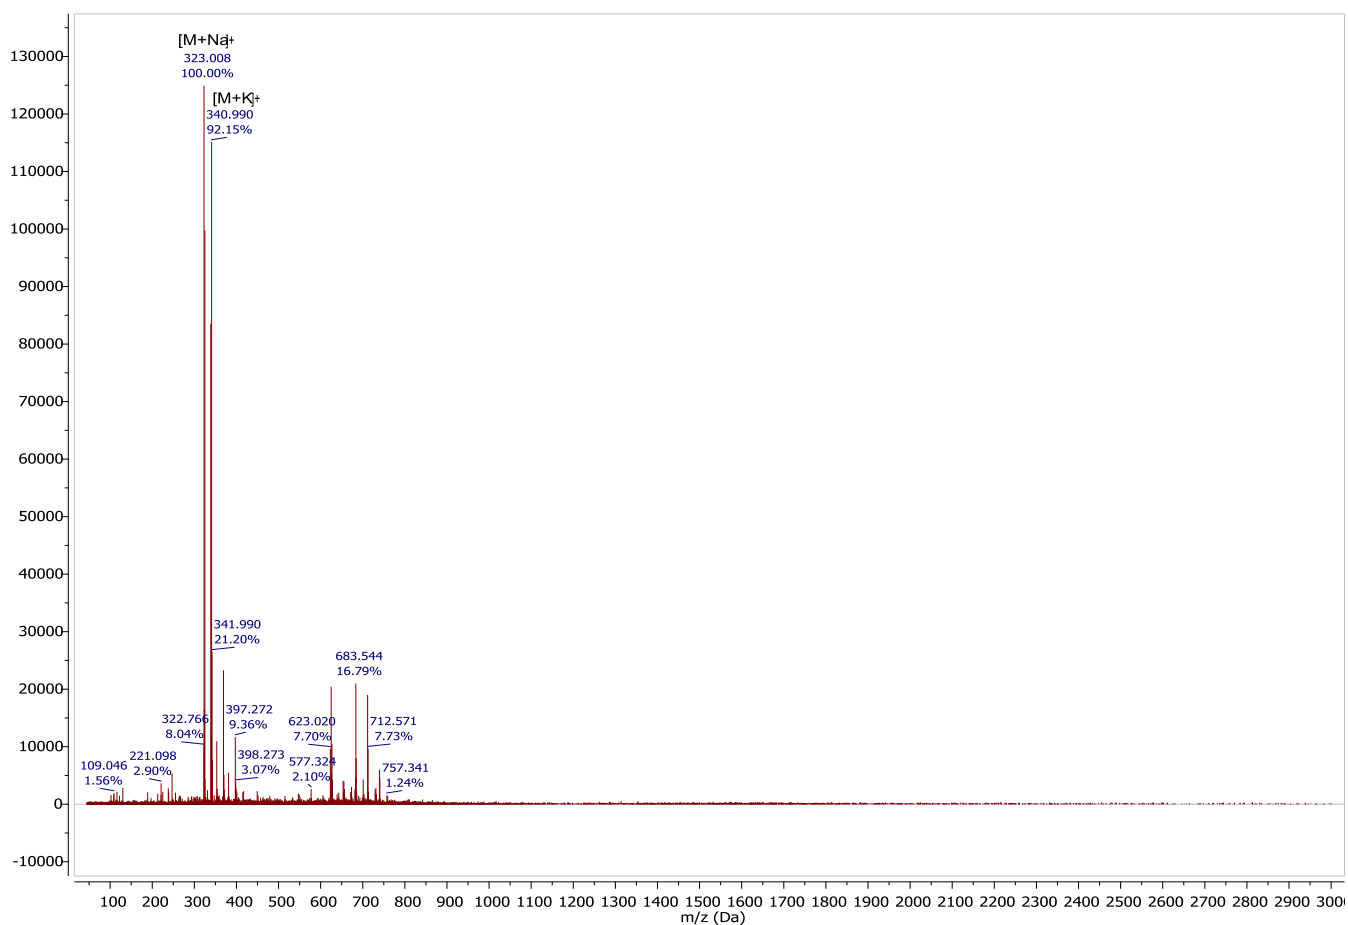

HR-MS (ESI-TOF) calculated for  $\text{C}_{13}\text{H}_{14}\text{O}_2\text{BrF}$ ,  $m/z$   $[\text{M}+\text{Na}]^+$ : 323,0058836; experimental value: 323.008034



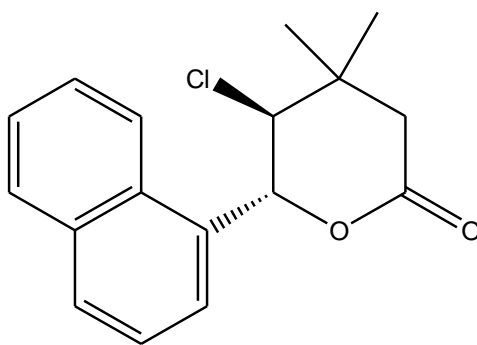

**Compound 7a** *trans*-5-chloro-4,4-dimethyl-6-( $\alpha$ -naphthyl)tetrahydro-2H-pyran-2-one

Yield 75%, colorless crystals, m.p. = 192–193 °C,

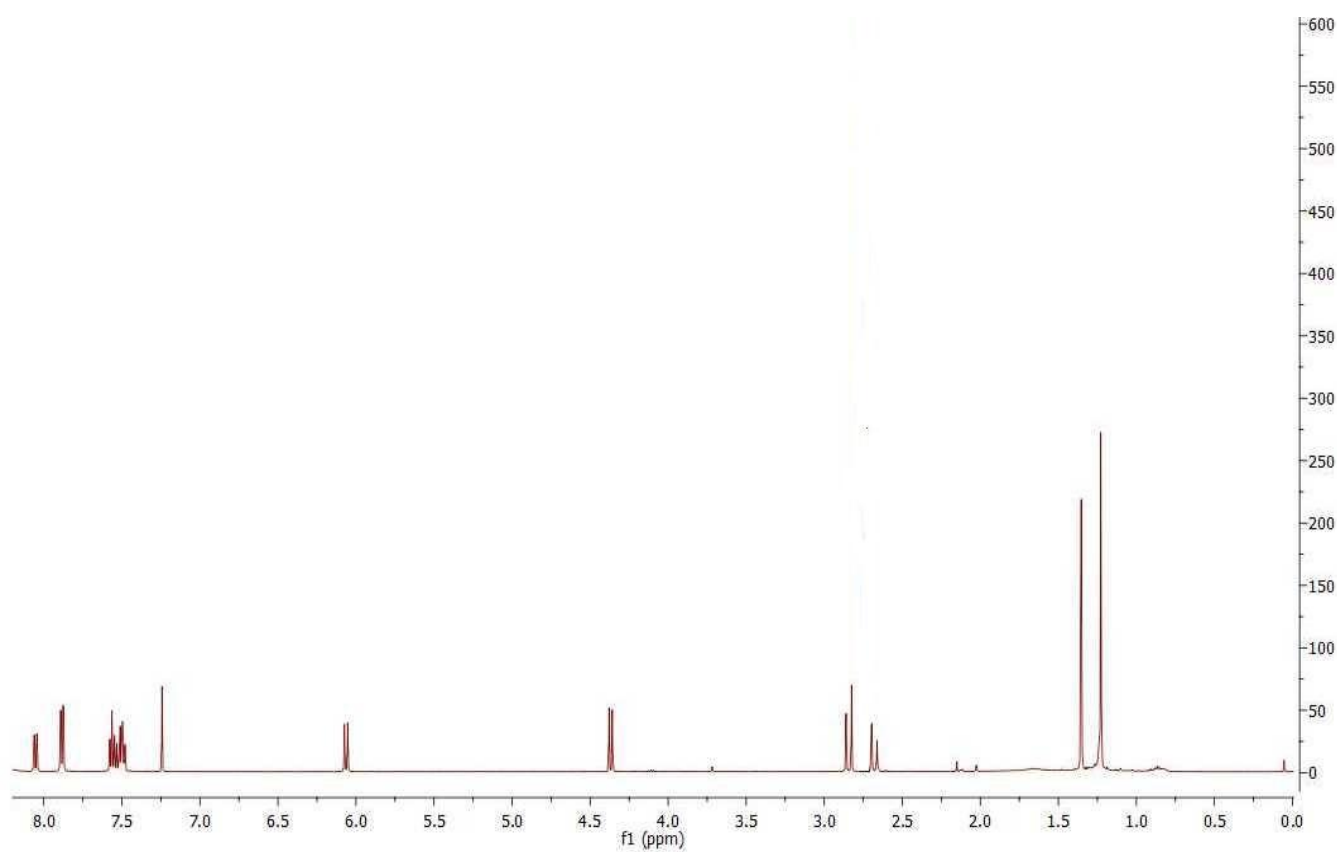

$^1\text{H}$  NMR ( $\text{CDCl}_3$ , 500 MHz),  $\delta$  [ppm]: 1.23 (s,  $\text{C}(\text{CH}_3)_2$ , 3H), 1.35 (s,  $\text{C}(\text{CH}_3)_2$ , 3H), 2.68 (d,  $J = 17.4$  Hz,  $\text{CH}_2$ , 1H), 2.84 (d,  $J = 17.4$  Hz,  $\text{CH}_2$ , 1H), 4.37 (d,  $J = 10.4$  Hz,  $\text{CHCl}$ , 1H), 6.06 (d,  $J = 10.4$  Hz,  $\text{CHAr}$ , 1H), 7.47–7.60 (m,  $\text{HAr}$ , 4H), 7.88 (d,  $J = 7.8$  Hz,  $\text{HAr}$ , 2H), 8.05 (d,  $J = 8.5$  Hz,  $\text{HAr}$ , 1H).

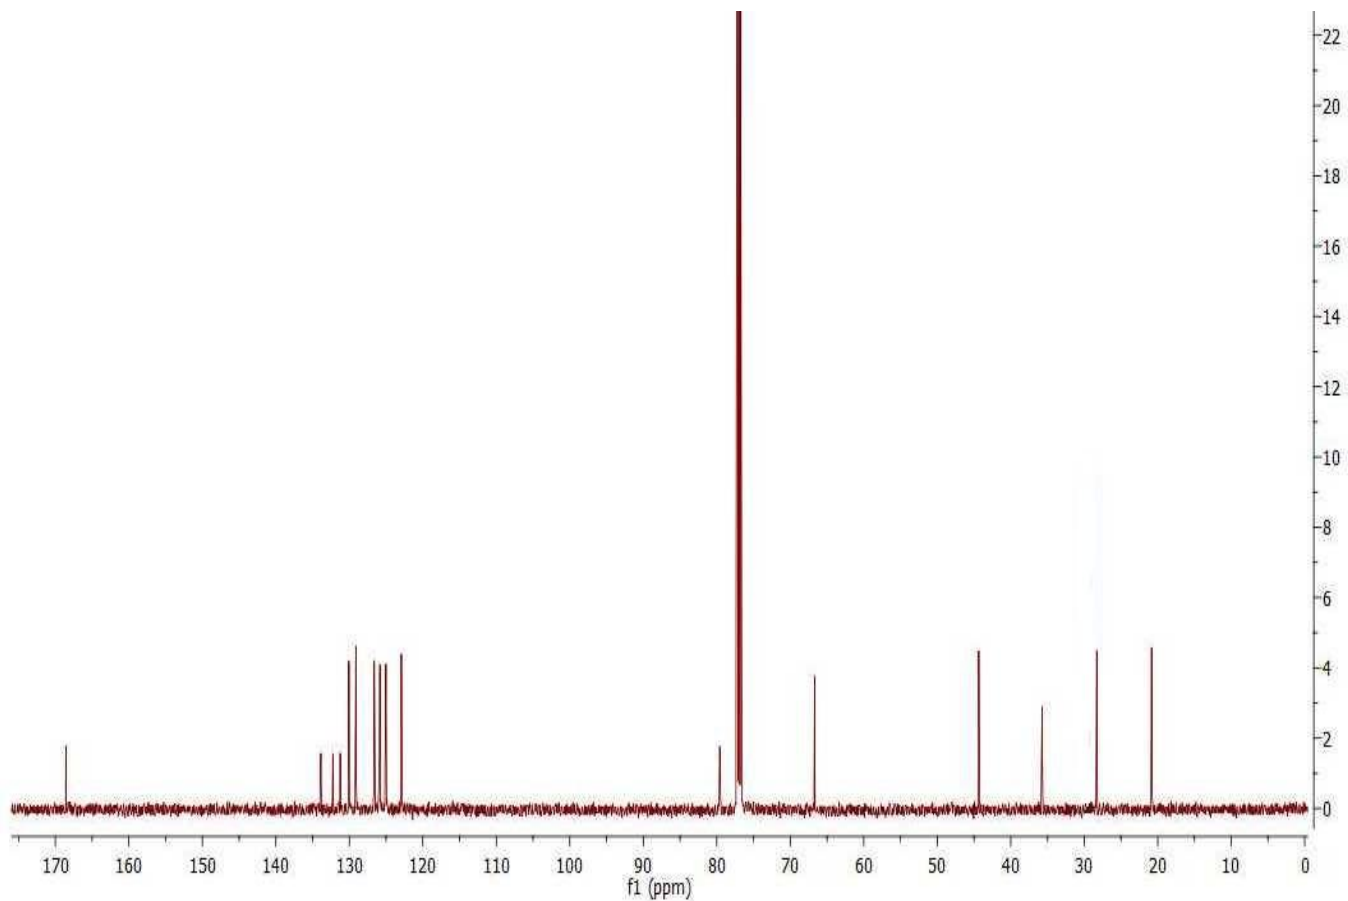

$^{13}\text{C}$  NMR (125 Hz,  $\text{CDCl}_3$ )  $\delta$  [ppm]: 20.83, 29.54, 35.72, 44.35, 66.68, 79.59, 122.92, 125.01, 125.84, 125.91, 126.61, 129.10, 130.06, 131.24, 132.24, 133.87, 168.56.

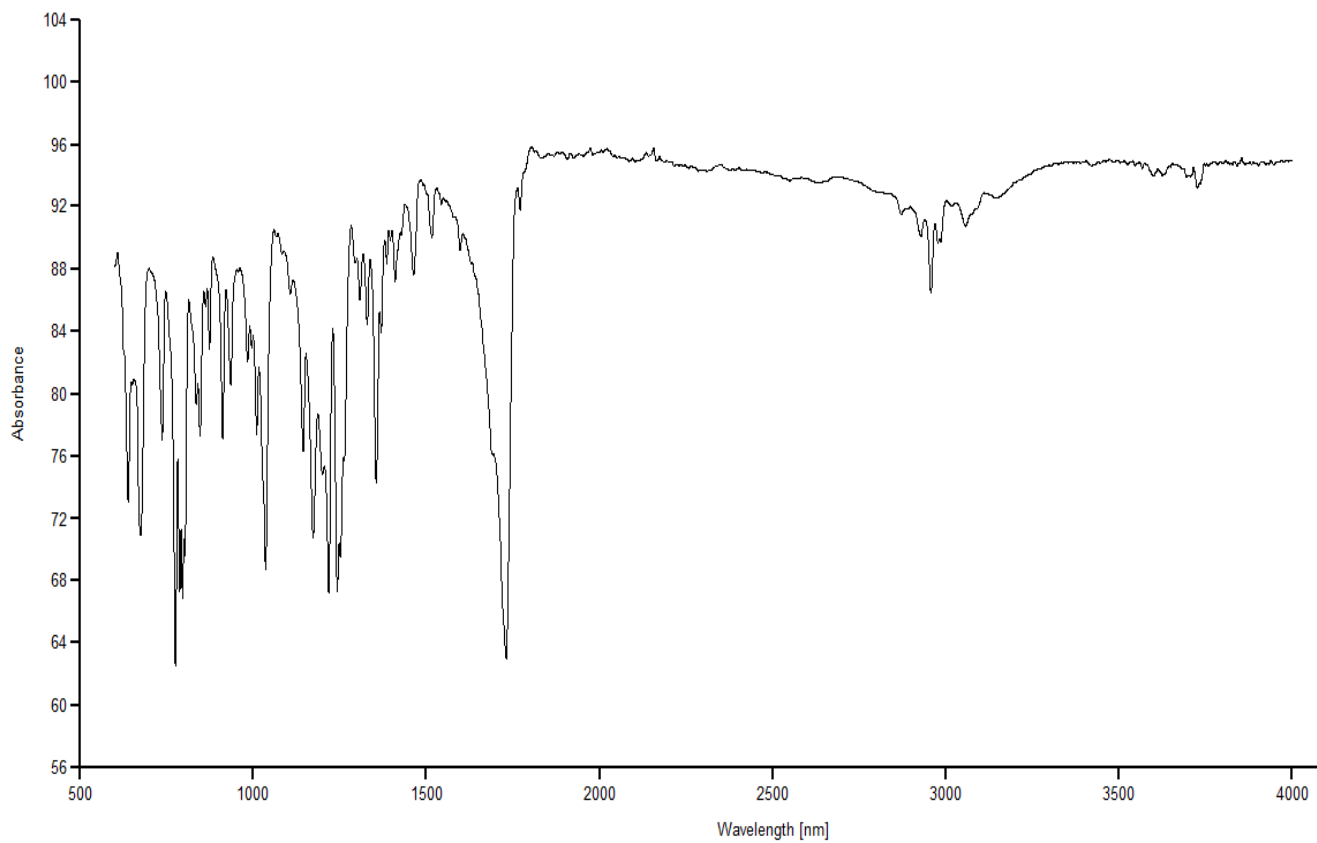

IR: 1730, 1350, 1240, 1216, 1170, 1140, 1035, 930, 910, 850, 790, 775, 730, 675, 640  $\text{cm}^{-1}$ .

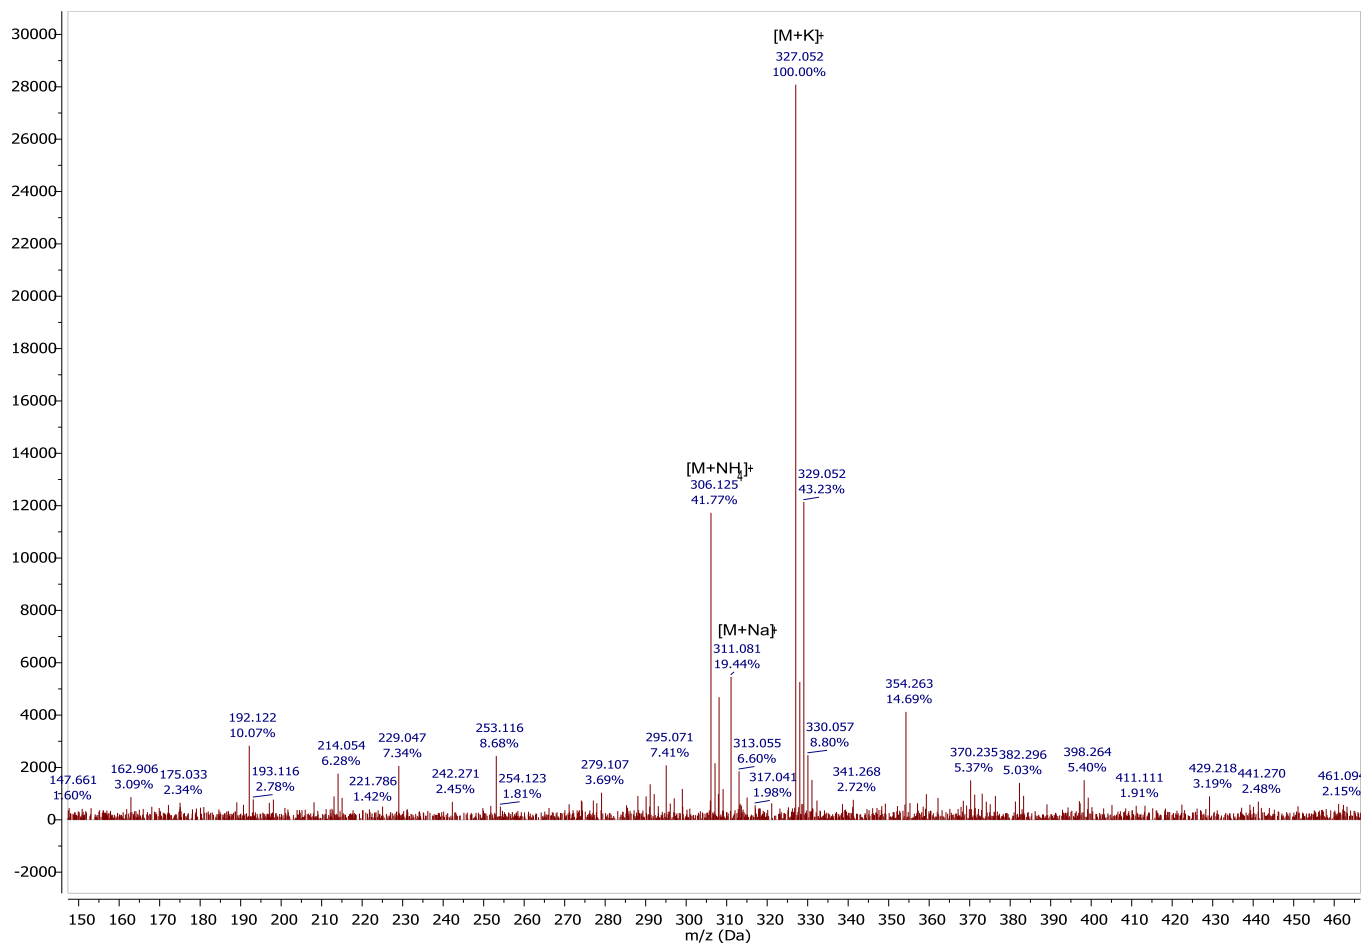

HR-MS (ESI-TOF) calculated for  $C_{17}H_{17}ClO_2$ ,  $m/z$   $[M+Na]^+$ : 311.0814712; experimental value: 311.080645.

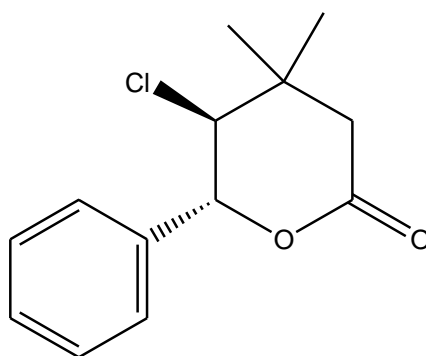

**Compound 7b** *trans*-5-chloro-4,4-dimethyl-6-phenyltetrahydro-2H-pyran-2-one

Yield 85%, colorless crystals, m.p. = 96-97 °C,

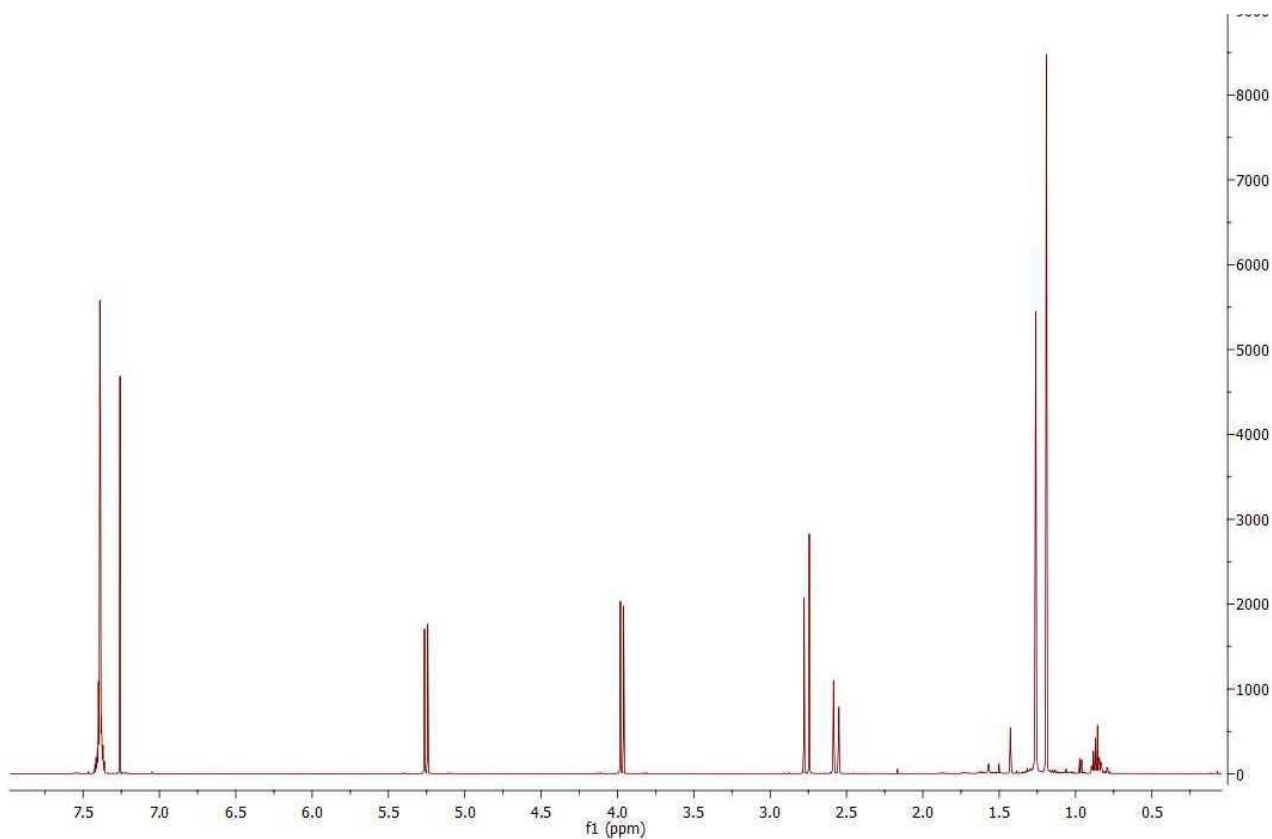

$^1\text{H}$  NMR ( $\text{CDCl}_3$ , 500 MHz),  $\delta$  [ppm]: 1.19 (s,  $\text{C}(\text{CH}_3)_2$ , 3H), 1.26 (s,  $\text{C}(\text{CH}_3)_2$ , 3H), 2.57 (d,  $J = 17.4$  Hz,  $\text{CH}_2$ , 1H), 2.76 (d,  $J = 17.4$  Hz,  $\text{CH}_2$ , 1H), 3.97 (d,  $J = 10.4$  Hz,  $\text{CHCl}$ , 1H), 5.25 (d,  $J = 10.4$  Hz,  $\text{CHAr}$ , 1H), 7.33–7.44 (m,  $\text{HAr}$ , 5H).

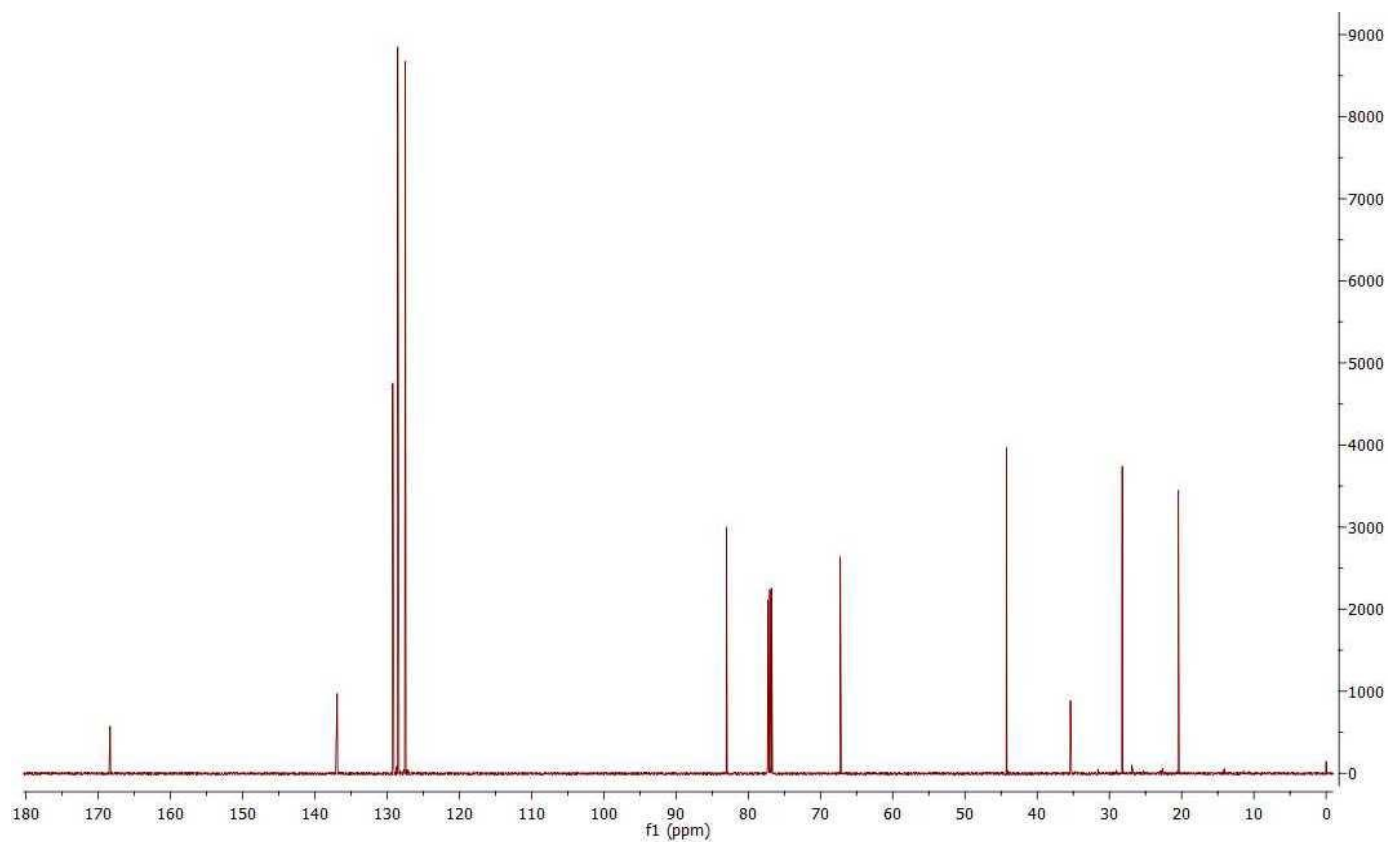

$^{13}\text{C}$  NMR (125 Hz,  $\text{CDCl}_3$ )  $\delta$  [ppm]: 20.45, 28.22, 35.39, 44.26, 67.26, 83.01, 127.48, 128.53, 129.22, 136.92, 168.35.

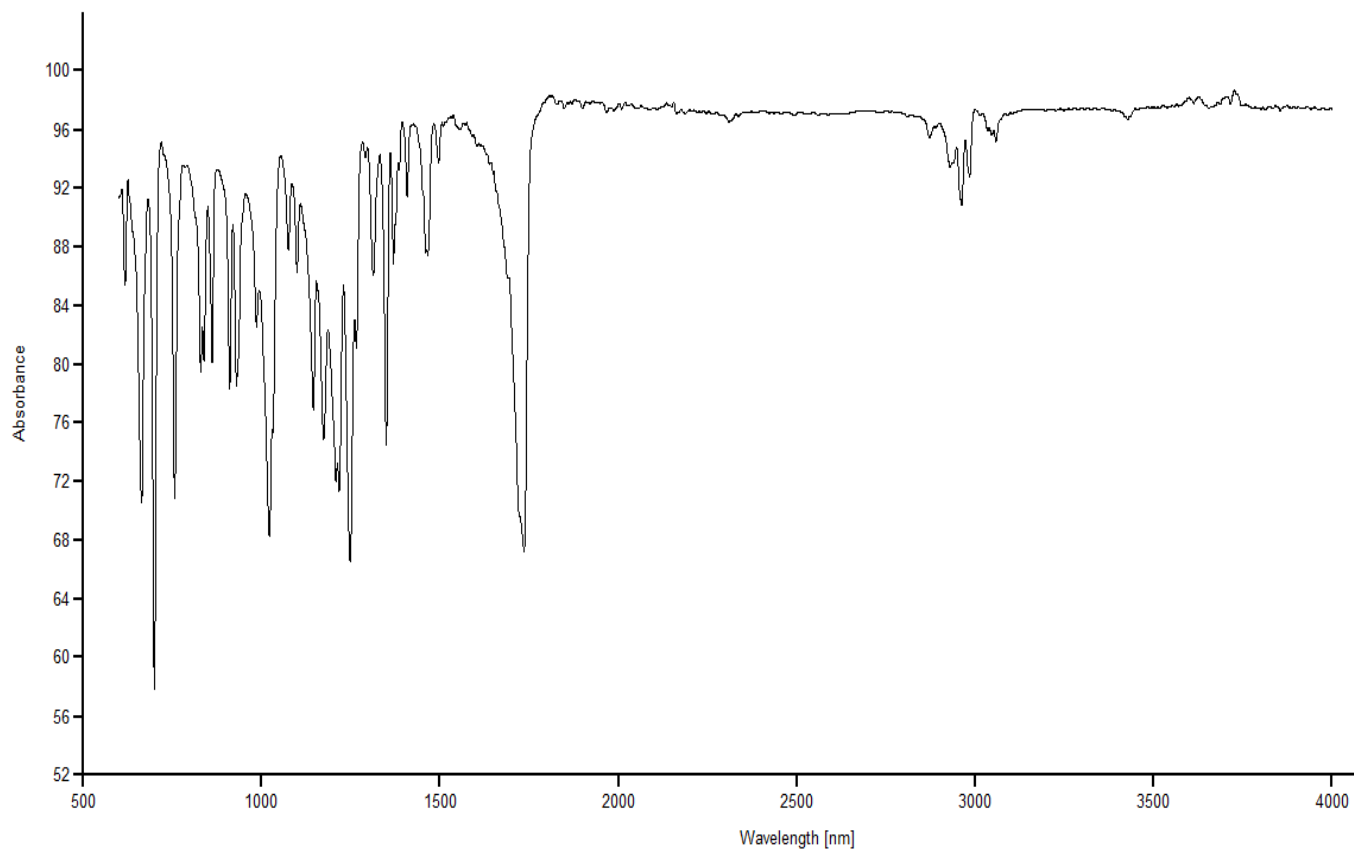

IR: 1733, 1460, 1350, 1250, 1215, 1174, 1143, 1020, 930, 910, 863, 830, 760, 700, 660  $\text{cm}^{-1}$ .

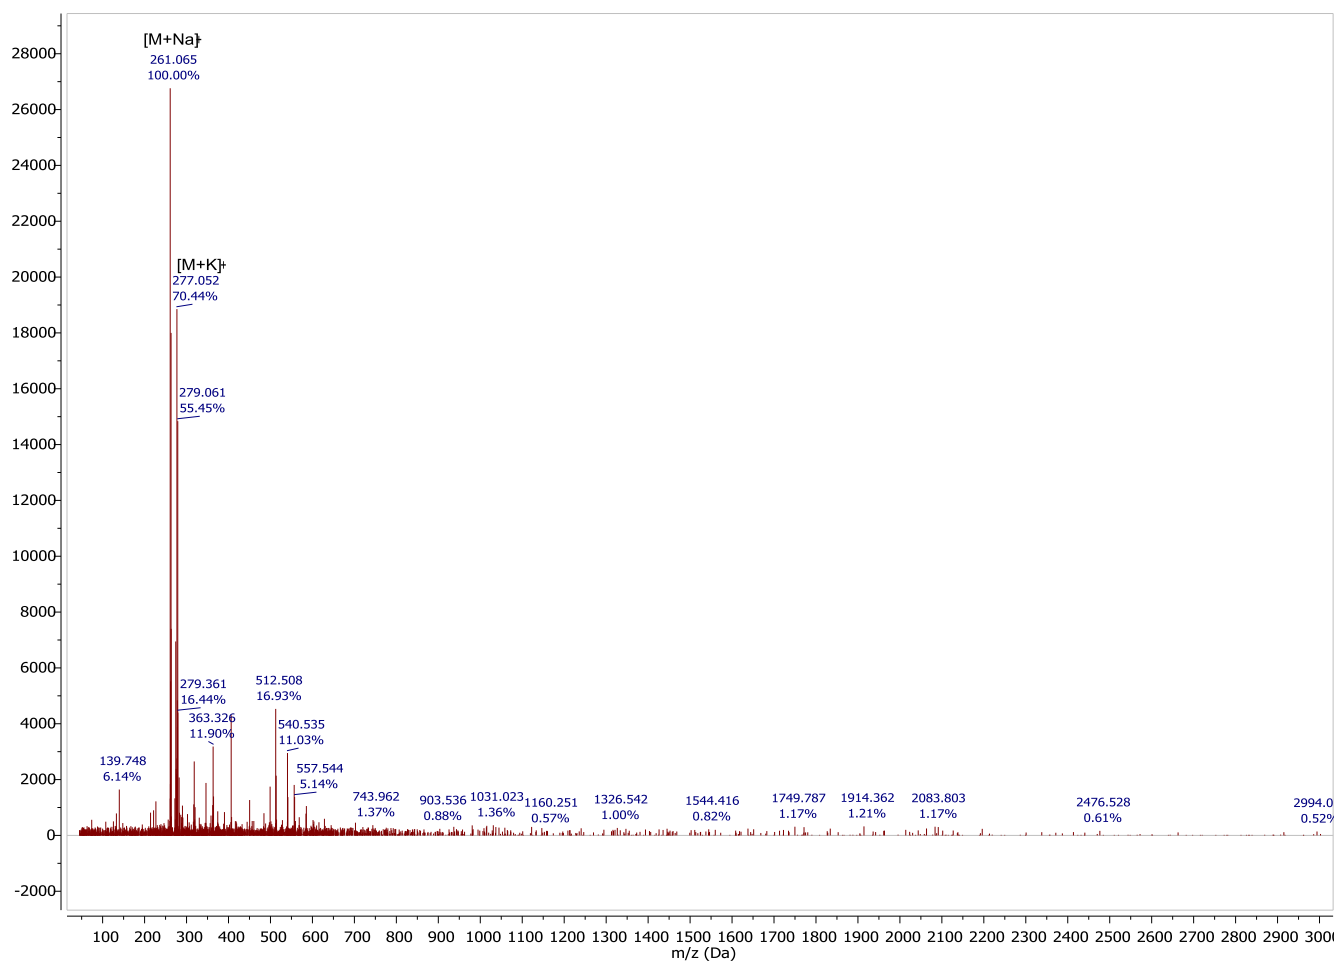

HR-MS (ESI-TOF) calculated for  $\text{C}_{13}\text{H}_{15}\text{ClO}_2$ ,  $m/z$   $[\text{M}+\text{Na}]^+$ : 261.065822; experimental value: 261.065139

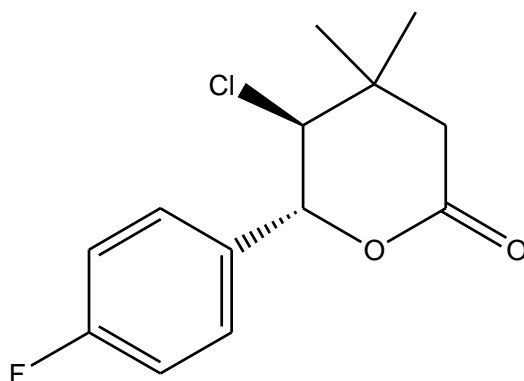

**Compound 7c** *trans*-5-chloro-6-(*p*-fluorophenyl)-4,4-dimethyltetrahydro-2H-pyran-2-one

Yield 65%, colorless crystals, m.p. = 89-90 °C,

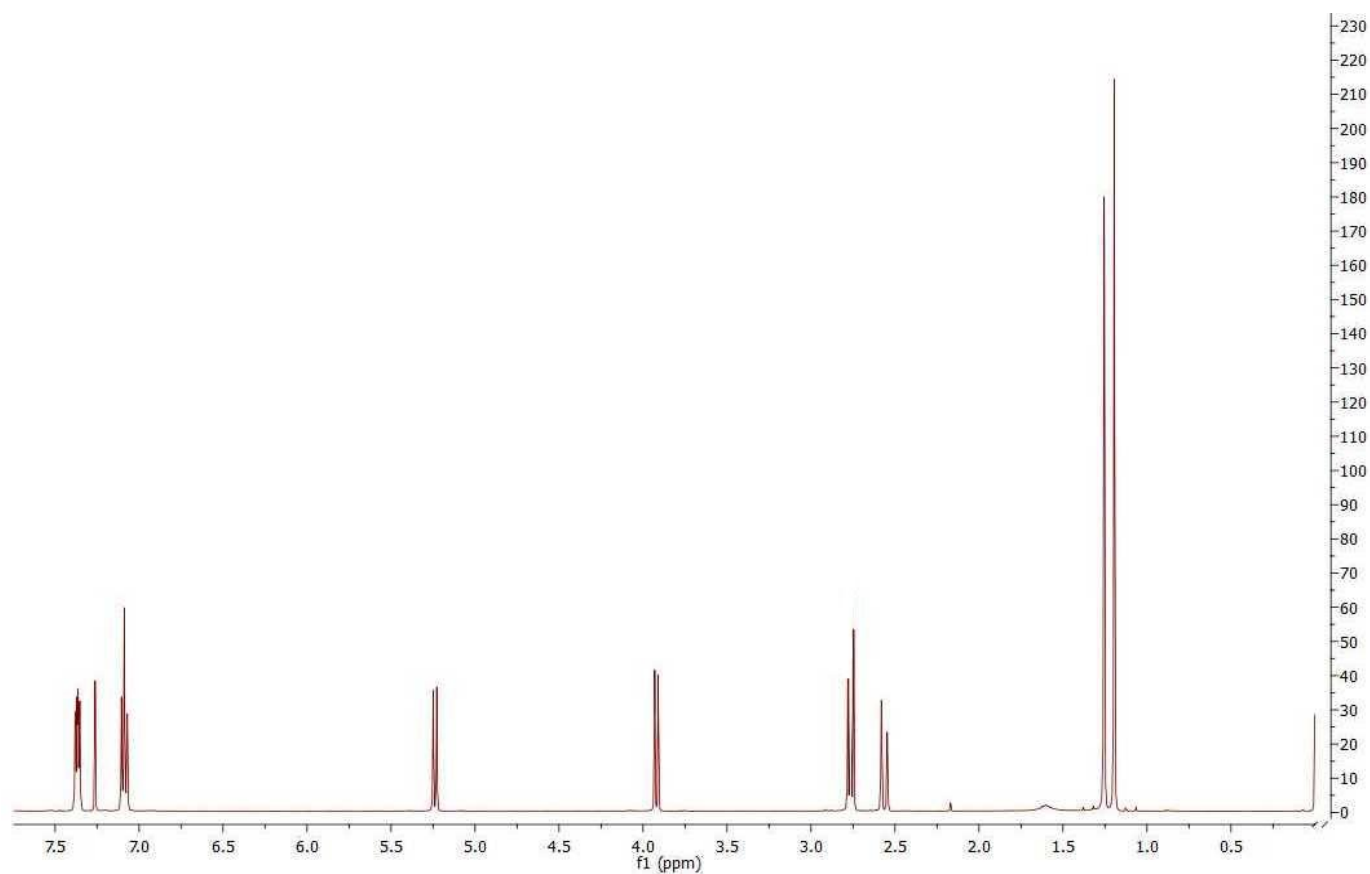

$^1\text{H}$  NMR ( $\text{CDCl}_3$ , 500 MHz)  $\delta$  [ppm]: 1.19 (s,  $\text{C}(\text{CH}_3)_2$ , 3H), 1.26 (s,  $\text{C}(\text{CH}_3)_2$ , 3H), 2.56 (d,  $J = 17.4$  Hz,  $\text{CH}_2$ , 1H), 2.76 (d,  $J = 17.4$  Hz,  $\text{CH}_2$ , 1H), 3.92 (d,  $J = 10.5$  Hz,  $\text{CHCl}$ , 1H), 5.24 (d,  $J = 10.5$  Hz,  $\text{CHAr}$ , 1H), 6.98–7.14 (m,  $\text{HAr}$ , 2H), 7.31–7.42 (m,  $\text{HAr}$ , 2H).

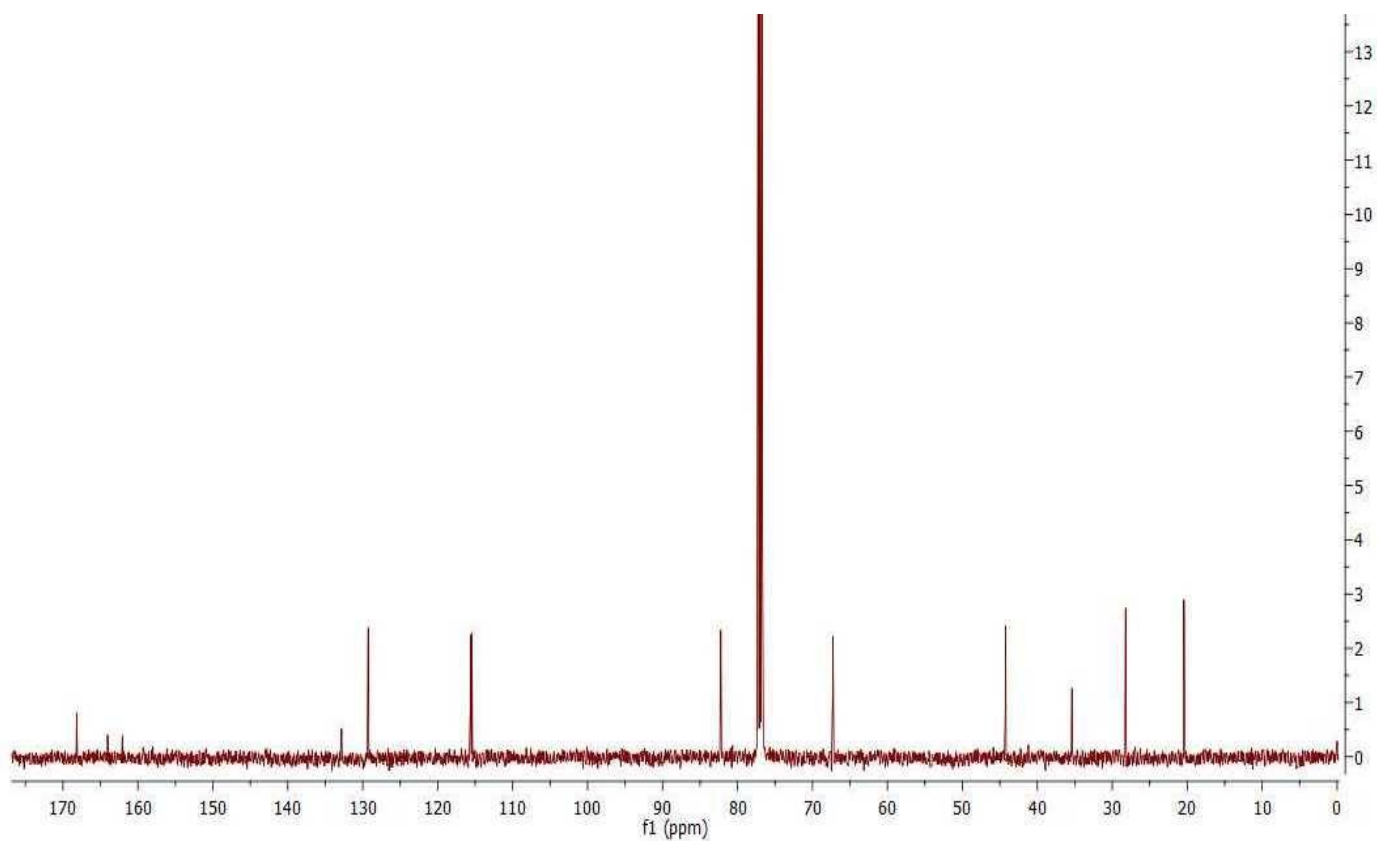

$^{13}\text{C}$  NMR (125Hz,  $\text{CDCl}_3$ )  $\delta$  [ppm]: 20.43, 28.22, 35.38, 44.24, 67.28, 82.23, 115.53, 129.30, 132.80, 163.05, 168.17.

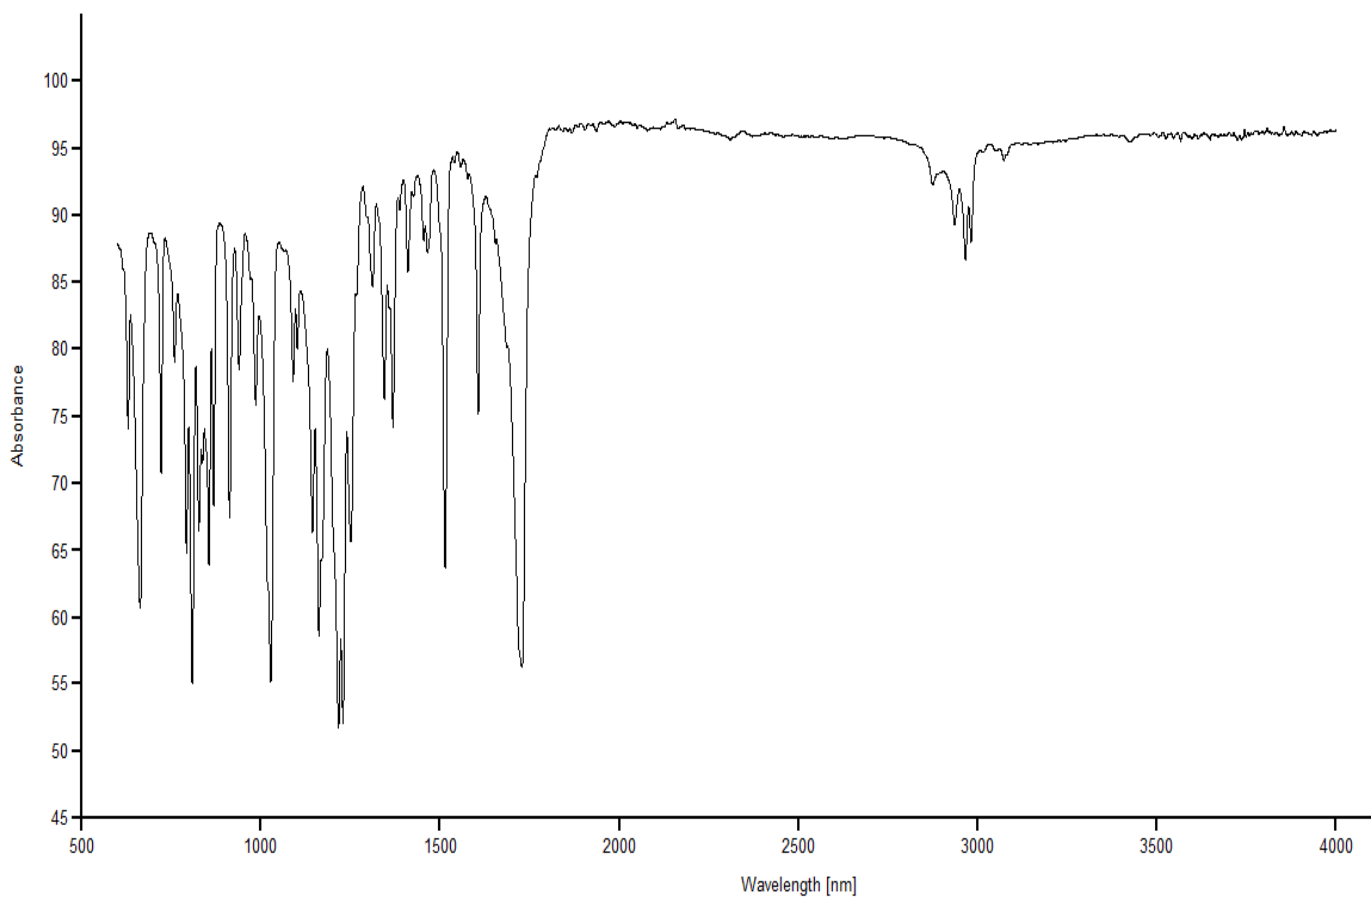

IR: 1730, 1605, 1515, 1370, 1340, 1250, 1230, 1160, 1025, 913, 850, 805, 722, 660, 625  $\text{cm}^{-1}$ .

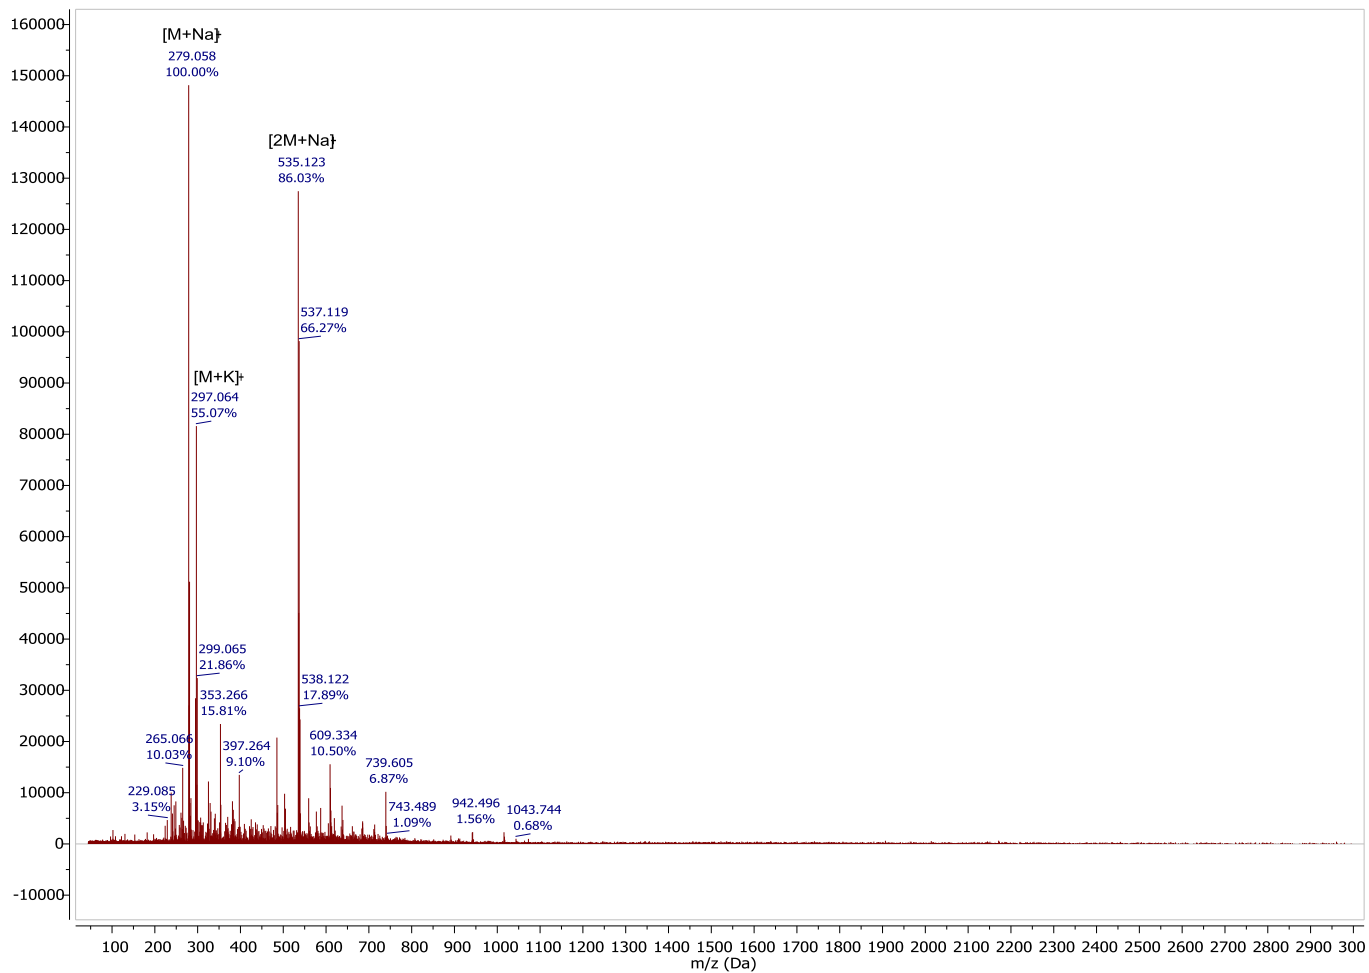

HR-MS (ESI-TOF) calculated for  $C_{13}H_{14}ClFO_2$ , m/z  $[M+Na]^+$ : 279.0564006; experimental value: 279.057500.
